## Sensitivity optimization of a rhodopsin-based fluorescent voltage indicator

Ahmed S Abdelfattah<sup>1,2,3\*\*</sup>, Jihong Zheng<sup>3\*</sup>, Daniel Reep<sup>3,4</sup>, Getahun Tsegaye<sup>3,4</sup>, Arthur Tsang<sup>3,4</sup>, Benjamin J Arthur<sup>3</sup>, Monika Rehorova<sup>5</sup>, Carl VL Olson<sup>5</sup>, Yi-Chieh Huang<sup>6</sup>, Yichun Shuai<sup>3</sup>, Minoru Koyama<sup>3</sup>, Maria V Moya<sup>7</sup>, Timothy D Weber<sup>7</sup>, Andrew L Lemire<sup>3</sup>, Christopher A Baker<sup>8,9</sup>, Natalie Falco<sup>3</sup>, Qinsi Zheng<sup>3</sup>, Jonathan B Grimm<sup>3</sup>, Mighten C Yip<sup>10</sup>, Deepika Walpita<sup>3</sup>, Craig R Forest<sup>10</sup>, Martin Chase<sup>11</sup>, Luke Campagnola<sup>8</sup>, Gabe Murphy<sup>8</sup>, Allan M Wong<sup>3,4</sup>, Jerome Mertz<sup>7</sup>, Michael N Economo<sup>7</sup>, Glenn Turner<sup>3,4</sup>, Bei-Jung Lin<sup>6</sup>, Tsai-Wen Chen<sup>6</sup>, Ondrej Novak<sup>5</sup>, Luke D Lavis<sup>3</sup>, Karel Svoboda<sup>3,4</sup>, Wyatt Korff<sup>3,4</sup>, Eric R Schreiter<sup>3,4†#</sup>, Jeremy P Hasseman<sup>3,4†#</sup>, Ilya Kolb<sup>3,4†#</sup>

<sup>1</sup>Department of Neuroscience, Brown University, Providence, RI 02906, USA

<sup>2</sup>Carney Institute for Brain Science, Brown University, Providence, RI 02906, USA

<sup>3</sup>Janelia Research Campus, Howard Hughes Medical Institute, Ashburn, VA 20147, USA

<sup>4</sup>GENIE Project Team

<sup>5</sup>Department of Physiology, Second Faculty of Medicine, Charles University, Plzenska 130/221, CZ-15006 Prague 5, Czech Republic

<sup>6</sup>Institute of Neuroscience, National Yang Ming Chiao Tung University, Taipei, 112, Taiwan

<sup>7</sup>Department of Biomedical Engineering, Boston University, 44 Cummington Mall, Boston MA 02215, USA

<sup>8</sup>Allen Institute, Seattle, WA, USA

<sup>9</sup>Department of Neurology, Yale School of Medicine, New Haven, CT, USA

<sup>10</sup>George W. Woodruff School of Mechanical Engineering, Georgia Institute of Technology, 315 Ferst Dr NW Atlanta, GA, USA, 30332

<sup>11</sup>Unaffiliated

\*contributed equally to this work

†co-supervised this work

#corresponding authors:

- ASA: [ahmed\\_abdelfattah@brown.edu](mailto:ahmed_abdelfattah@brown.edu)
- ERS: [schreitere@janelia.hhmi.org](mailto:schreitere@janelia.hhmi.org)
- JPH: [hassemanj@janelia.hhmi.org](mailto:hassemanj@janelia.hhmi.org)
- IK: [kolbi@janelia.hhmi.org](mailto:kolbi@janelia.hhmi.org)

## Abstract

The ability to optically image cellular transmembrane voltage at millisecond-timescale resolution can offer unprecedented insight into the function of living brains in behaving animals. The chemigenetic voltage indicator Voltron is bright and photostable, making it a favorable choice for long *in vivo* imaging of neuronal populations at cellular resolution. Improving the voltage sensitivity of Voltron would allow better detection of spiking and subthreshold voltage signals. We performed site saturation mutagenesis at 40 positions in Voltron and screened for increased  $\Delta F/F_0$  in response to action potentials (APs) in neurons. Using a fully automated patch-clamp system, we discovered a Voltron variant (Voltron.A122D) that increased the sensitivity to a single AP by 65% compared to Voltron. This variant (named Voltron2) also exhibited approximately 3-fold higher sensitivity in response to sub-threshold membrane potential changes. Voltron2 retained the sub-millisecond kinetics and photostability of its predecessor, with lower baseline fluorescence. Introducing the same A122D substitution to other Ace2 opsin-based voltage sensors similarly increased their sensitivity. We show that Voltron2 enables improved sensitivity voltage imaging in mice, zebrafish and fruit flies. Overall, we have discovered a generalizable mutation that significantly increases the sensitivity of Ace2 rhodopsin-based sensors, improving their voltage reporting capability.

## Introduction

Genetically encoded voltage indicators (GEVIs) have served as an enabling technology for visualizing neuronal activity at unprecedented spatiotemporal resolution (Hochbaum et al. 2014; Lin and Schnitzer 2016; Xu et al. 2017). Nevertheless, optical imaging of voltage using GEVIs presents many challenges for the design of these proteins. An ideal voltage sensor must concurrently fulfill many requirements, including but not limited to: (1) high sensitivity to membrane potential changes of a neuron, (2) fluorescence changes that are fast enough to follow and accurately report APs and (3) high degree of localization to neuron outer membranes. Further requirements may be desirable depending on application, such as sensitivity to sub-threshold membrane potential changes, photostability, and compatibility with two-photon excitation.

One approach to engineering GEVIs involves exploiting the native voltage sensitivity of microbial rhodopsins. The opsin Archaeorhodopsin 3 (Arch) was first successfully used to optically record APs in neuronal culture (Kralj et al. 2012); however, it was found to be too dim at physiologically tolerable imaging powers for *in vivo* applications. Subsequent protein engineering efforts of Arch yielded improvements in brightness as well as sensitivity, kinetics, and reduced photocurrents (Chien et al. 2021; Flytzanis et al. 2014; Gong et al. 2013; Hochbaum et al. 2014; McIsaac et al. 2014; Piatkevich et al. 2018). An alternative strategy to develop bright rhodopsin-based GEVIs is to create a Förster resonance energy transfer (FRET) pair between a bright fluorescent protein (FP) and the rhodopsin protein (Gong et al. 2015; Zou et al. 2014). In this strategy, the bright FP is the reporter fluorophore, and the rhodopsin is used as the voltage sensitive domain. This strategy was successfully implemented to develop Ace2N-mNeon, a bright fast GEVI that was able to report single APs *in vivo* (Gong et al. 2015).

The Ace2N-mNeon member of the rhodopsin family of GEVIs has been used as a scaffold to create GEVIs with other favorable characteristics. A red GEVI called VARNAM consisting of Ace2N fused to a red FP mRuby3 displayed high sensitivity, good *in vivo* performance, and a spectral shift that made it compatible with blue-shifted optogenetic probes (Kannan et al. 2018). Our group has previously replaced the FP in Ace2N-mNeon with a HaloTag protein (Los et al. 2008) covalently bound to a small-molecule fluorophore (JaneliaFluor or JF (Grimm et al. 2015, 2017)) to create a chemigenetic sensor called Voltron (Abdelfattah et al. 2019). The introduction of three point mutations to the rhodopsin domain of Voltron led to Positron, a positive-going GEVI with sensitivity and kinetics comparable to the original Voltron (Abdelfattah et al. 2020).

Encouraged by the ability of point mutations in the rhodopsin domain to alter function, we performed a large-scale screen of point mutations to find improved versions of Voltron. We discovered that the introduction of an A122D mutation increased the sensitivity of Voltron, particularly in the sub-threshold range, without compromising kinetics, membrane trafficking or photobleaching. Thus Voltron.A122D was named Voltron2 as a next-generation version of the sensor. Consistent with the observation in culture, *in vivo* imaging in flies, zebrafish and mice revealed an increased signal-to-noise ratio (SNR) of Voltron2 compared to Voltron.

## Methods

### Reagent availability

The following plasmids used in this study are available on Addgene:

- pAAV-syn-FLEX-Ace2N-4AA-mNeon-ST A122D WPRE (#172908)
- pGP-pcDNA3.1 Puro-CAG-Voltron2 (#172909)
- pGP-CAG-Ace2N-4AA-mNeon A122D-WPRE-bGH-polyA (#172911)
- pGP-CAG-Ace2N-4AA-mNeon-ST A122D-WPRE-bGH-polyA (#172912)

The JF<sub>549</sub>-HaloTag ligand is available from Promega; all other dyes can be requested at [dyes.janelia.org](https://dyes.janelia.org).

### Single-site directed mutagenesis

The cloning vector pcDNA3.1/Puro-CAG- Ace2N\_HaloTag expression vector (Invitrogen) was modified by moving the KpnI site from outside of the insert to the junction between Ace2N domain and the Halo-tag. The subsequent vector was digested by NheI/KpnI cleaving out the Ace2N domain. End PCR primers were designed 30bp upstream of NheI site (5'-GCTCACAAATACCACT-3') and 38 bp downstream of new KpnI site (5'-CCAGGACTTCCACATAA-3'). Overlapping internal primers were designed for each of 40 targeted amino acid residues in the Ace2N domain. One primer of the pair contained the degenerate codon NNS and the other primer a 27-30bp complementary overhang. When paired with the end primers two amplicons were created (Phusion High-Fidelity DNA Polymerase; NEB) that overlap with each other and the digested vector ends. Each set of overlapping paired amplicons (37.5 fmol each) were assembled with the digested pcDNA3.1/Puro-CAG backbone (25 fmol) using an isothermal assembly reaction (Gibson et al. 2009). Each 20 uL reaction mix consisted of 5X isothermal assembly buffer (25% PEG-8000, 500 mM Tris-HCl pH 7.5, 50mM MgCl<sub>2</sub>, 50mM DTT, 1mM each dNTP and 5mM NAD), T5 exonuclease (0.08 U, NEB), Taq DNA Ligase (80 U, NEB), Phusion HF DNA Polymerase (0.5 U, NEB). The reactions were incubated at 50°C for 30-60 minutes. Reactions were transformed into STABL2 chemically competent E. coli cells (ThermoFisher) and plated on LB/Amp agar plates and incubated at 37°C for 16-20 hours.

For each site library, 96 colonies were picked into 2.6 mL of 2x-YT media (2 x 1.3 mL in 2mL deep-well culture plates) and grown for 24 hours, 225 rpm @37°C with Ampicillin (100mg/L). The cultures were pelleted at 3200 x g and frozen at -80°C. For each plate plasmids were extracted using the E-Z 96 FastFilter Kit (Omega BioTek) and eluted into a half-area UV transparent 96 well plate (Corning Costar). Each of the plasmid plates was concentration normalized to 60ng/ul by reading the 260nm absorbance (Tecan Infinite M1000Pro) followed by custom dilution (Hamilton Nimbus). Variant plasmids were arrayed along with controls for high-throughput electroporation of neuronal cell culture (Hamilton STAR). Top performing variants from the subsequent neuronal culture screen were Sanger-sequenced to determine their mutation as well as the entire library being sequenced using a next-generation deep-sequencing approach (Supplementary Methods).

## **Combinatorial mutagenesis**

Top-performing single-site mutations (Y63L, N69E, V74E/W, R78H, N81S, L89A/C/G/T, A122D/H, V196P) were recombined to test all possible combinations (1423). All combinations could be recapitulated using two overlapping amplicons covering the Ace2N domain. Some mutations (Y63L, A122D/H, V196P) were introduced as part of the PCR template and others (N69E, V74E/W, R78H, N81S, L89A/C/G/T) by PCR primer. For the N-term amplicon (305bp) twenty-four reverse primers were designed based on the wild-type anti-sense sequence (5'-AGTGGTGTGGTCAGCACCCAGTTAATATATCTTGCCTAGACCACCTGCCTTTCCACCATTCATTGTCAGGTC C-3') and included every combination of N69E, V74E/W, R78H, N81S. Forty-eight unique N-term amplicons were created by combining these twenty-four reverse mutagenic primers, the upstream end primer (5'-GCTCACAAATACCACT-3') and templates with and without Y63L. For the C-term amplicon (493bp) 10 forward primers were designed based on the wild-type sense sequence (5'-ATATTAAGTGGGTGCTGACCACCACTGCTCCTGCTCGATCTCATCGTCATGACCAAGATGGGCGGAGT GA -3') and included every combination of N81S, L89A/C/G/T. Sixty unique C-term amplicons were created by combining 10 forward mutagenic primers, the downstream end primer (5'-CCAGGACTTCCACATAA-3') and templates each containing a combination of A122D/H and V196P. The N-term and C-term amplicon libraries overlapped by 28 bp (5'-ATATTAAGTGGGTGCTGACCACCACT-3') and included the N81 site in both. The PCR products were gel extracted, quantified and normalized to 18.75 fmol/ul. The NheI/KpnI digested pcDNA3.1/Puro-CAG backbone was normalized to 12.5 fmol/ul. Using a liquid-handling robot (Hamilton STAR) the N-term and C-term amplicons sets were pairwise combined (2uL each) along with the NheI/KpnI digested pcDNA3.1/Puro-CAG vector (2uL) to create 1423 unique isothermal assembly reactions in 96 well thermocycler plates. The plates were reacted and transformed as above in 96 well plates. Approx. 35uL of each transformant was robotically dispensed into the corresponding wells of two 48 well Q-trays (Genetix) containing LB/Amp agar. Q-trays were incubated for 16-20 hours at 37°C and two colonies were picked from each well and separately cultured, pelleted and frozen in 96 well deep well plates. Plasmids were extracted from the 96 well pellets and concentration normalized as above. Once verified by Sanger sequencing the combinatorial variants were arrayed for electroporation of neuronal cell culture and the subsequent field stimulation assay.

## **Neuronal cell culture**

Experiments were conducted in accordance with guidelines for animal research approved by the Janelia Research Campus Institutional Animal Care and Use Committee. Neonatal rat pups (Charles River Laboratory) were euthanized and neocortices (for field stimulation experiments) or hippocampi (for patch-clamp experiments), were isolated. Tissue was dissociated using papain (Worthington) in 10 mM HEPES pH 7.4 in Hanks' Balanced Salt Solution for 30 min at 37°C. Suspensions were triturated with a Pasteur pipette and passed through a 40-µm strainer. Cells were transfected by combining  $5 \times 10^5$  viable cells with 400 ng plasmid DNA and nucleofection solution in a 25-µL electroporation cuvette (Lonza). Cells were electroporated according to the manufacturer's protocol.

For the field stimulation screen, neurons were plated onto poly-D-lysine (PDL) coated, 96-well, glass bottom (#1.5 cover glass) plates (MatTek) at  $\sim 1 \times 10^5$  cells per well in 100 µL of a 4:1 mixture of NbActiv4 (BrainBits) and plating medium (28 mM glucose, 2.4 mM NaHCO<sub>3</sub>, 100 µg/mL transferrin, 25 µg/mL insulin, 2 mM L-

glutamine, 100 U/mL penicillin, 10 µg/mL streptomycin, 10% FBS in MEM). The next day, 190 µL of NbActiv4 medium was added to each well. Plates were incubated at 37°C and 5% CO<sub>2</sub>, to be imaged after 12-15 days in culture. Typically, 8 wells of a 96-well plate were electroporated with Voltron (as a control) and the remaining wells were electroporated with constructs of interest (4 wells per construct). The first and last columns of the plate were not used.

For patch-clamp, ~2x10<sup>5</sup> cells were plated onto PDL-coated, 35-mm glass bottom plates (Mattek, #0 cover glass) in 120 µL of a 1:1 mixture of NbActiv4 and plating medium in the center of the plate. The next day, 2 mL of NbActiv4 medium was added to each plate. Plates were incubated for 7-13 days prior to beginning experiments.

### **Field stimulation assay in neuronal culture**

To prepare the neurons for field stimulation, they were first incubated for 1 hour in NbActiv4 media supplemented with 2 nM JF<sub>525</sub>-HaloTag at 37°C. They were then rinsed three times with imaging buffer containing (in mM) 140 NaCl, 0.2 KCl, 10 HEPES, 30 glucose (pH 7.3-7.4) and left in a solution containing imaging buffer with added receptor blockers (10 µM CNQX, 10 µM (R)-CPP, 10 µM gabazine, 1 mM (S)-MCPG, Tocris) to reduce spontaneous activity (Wardill et al. 2013).

The field stimulation assay for GEVIs was adapted from our existing screening pipeline (Dana et al. 2016, 2019). Fluorescence was excited with a white LED (Cairn Research) through a custom filter cube (Excitation: 512/25 nm, Emission: 555/20 nm, dichroic: 525 nm, Chroma) and imaged using a 40X/0.6 NA objective (Olympus) with an EMCCD camera (Ixon Ultra DU897, Andor). To enable high-speed imaging, an Optomask (Cairn Research) was used to mask out camera pixels outside a 256x256 center square. Reference images of each field of view (FOV) were taken at full sensor frame, 100 ms exposure. For high-speed imaging during stimulation, we applied 8x binning, 0.01 ms exposure, and 25 EM gain for a resulting frame rate of 1,497 Hz.

For each well in the 96-well plate, either 9 FOVs surrounding the center of the well were chosen, or a machine vision function utilizing ilastik (Berg et al. 2019) was used to automatically focus on cell somata. For each FOV, first, a reference image was acquired, and then, neuronal APs were evoked by field stimulation (8 pulses, 40 V, 1 ms, 8.3 Hz; S-48, Grass Instruments) concurrently with high-speed imaging. The camera 'fire' signal and the stimulator sense line were used to determine the frame at which the stimulation occurred.

To correct for photobleaching, a single exponential with three free parameters was fit to the time series for each pixel. Frames succeeding each electrical stimulus (during which the response nominally occurred) were excluded from the fit. The value of the fitted bleach function at the first frame was taken as the baseline fluorescence for that pixel. Background fluorescence was computed as the 1<sup>st</sup> percentile of the baseline fluorescence across all pixels.

Responses to the eight electrical pulses within each recording were averaged using the timings derived from the camera and electrode triggers. For each pixel, a Mann-Whitney U test was performed between the frames preceding the average response (20 ms) and 10, 20, and 40 ms of frames succeeding it. Pixels with a p value < 0.001 for any of these three tests were considered responsive and averaged together to contribute to



the  $\Delta F/F_0$  trace. Traces were fit with the product of a rising and decaying exponential to capture both the on and off kinetics. The fit was used to calculate the characteristics of the variant such as maximum  $\Delta F/F_0$  and kinetics (10-90% rise and decay times).

Pixel statistics were pooled across all the wells in each plate that contained the construct of interest. Wells with fewer than four responsive pixels were considered to be unresponsive and discarded from analysis.

For every plate in the field stimulation assay, a percent detectable improvement (PDI) statistic was calculated to answer the question: "Given the variability of Voltron control wells in the plate, what is the minimum improvement in  $\Delta F/F_0$  that can be reliably detected?". That is, a PDI of 20% for a plate indicates that a  $\geq 20\%$  improvement in  $\Delta F/F_0$  over Voltron can be considered statistically meaningful. Large PDI values are undesirable because they indicate high variability in the control responses. PDI is calculated as follows:  $100 * (\text{mean}(x) - \text{quantile}(x, 0.01)) / \text{mean}(x)$ , where  $x$  is the  $\Delta F/F_0$  of Voltron control well pixels, sampled 10,000 times with replacement. The PDI was one of the parameters used to screen out poorly responding variants.

Normalization to in-plate Voltron controls was useful to reduce the effects of within-plate and within-week variability. Pixels from each variant were pooled across wells. For each variant, the median was taken from this pool and divided by the median from the control pool to perform the normalization. Significance values for each variant were determined using a Mann-Whitney U test between the pools.

### **Automated whole-cell electrophysiology**

Cultured neurons were patch-clamped at 7-13 DIV at room temperature (23°C). On the day of the experiment, cell culture medium was first rinsed with imaging buffer consisting of (in mM): 145 NaCl, 2.5 KCl, 10 D-Glucose, 10 HEPES, 2 CaCl<sub>2</sub>, 1 MgCl<sub>2</sub> (pH 7.3, adjusted to 310 mOsm with sucrose). The cells were then incubated with 100 nM JF<sub>525</sub> dye for 10 minutes (for Voltron mutant screening only), rinsed twice, and kept in imaging buffer. For voltage clamp recordings, 1  $\mu$ M TTX was added to the bath to suppress the generation of APs. Micropipettes were pulled on a horizontal puller (P-97, Sutter Instruments) to a tip resistance of 3 to 6 M $\Omega$ . For voltage clamp experiments, pipettes were filled with cesium-based internal solution containing (in mM): 115 CsMeSO<sub>4</sub>, 15 CsCl, 3.5 Mg-ATP, 5 NaF, 10 EGTA, 10 HEPES, 3 QX-314 (pH 7.3-7.4, 280-290 mOsm). For current clamp experiments, pipettes were filled with 130 KMeSO<sub>4</sub>, 10 HEPES, 5 NaCl, 1 MgCl<sub>2</sub>, 1 Mg-ATP, 0.4 Na-GTP, 14 Tris-phosphocreatine (pH 7.3-7.4, 280-290 mOsm).

To perform automated patch-clamp screening of the top-performing hits from the field stimulation screen, we used a custom-built Automated uM Workstation, manufactured by Sensapex (Oulu, Finland), based on the PatcherBot (Kolb et al. 2019). The system is built around an AxioObserver 7 inverted microscope (Zeiss), outfitted with a computer-controlled stage, micromanipulators, and pipette pressure controllers. Pipettes were automatically cleaned between every patch-clamp attempt with Tergazyme and reused, enabling higher throughput than possible with manual patch-clamp (Kolb et al. 2016, 2019). Electrophysiology recordings were performed with a Multiclamp 700B amplifier (Molecular Devices), and digitized with a multifunction data acquisition board (National Instruments PCIe-6259). Neurons were imaged using a 40 $\times$ /1.3 NA oil immersion objective (Zeiss), illuminated with high-power LEDs (Spectra-X light engine, Lumencor) and imaged with a

digital sCMOS camera (Hamamatsu Orca Flash 4.0). To image Voltron<sub>525</sub>, we used a filter cube containing 510/25 nm excitation filter, 545/40 emission filter, 525 nm dichroic (Chroma), with a measured power of 14.7 mW/mm<sup>2</sup> in the imaging plane. To image Ace2N-mNeon, the filter cube contained a 470/24 nm excitation filter, 525/40 nm emission filter, 506 nm dichroic with a measured power of 18.1 mW/mm<sup>2</sup> in the imaging plane. To image VARNAM, the filter cube contained 575/25 nm excitation filter, 610LP emission filter, 594 nm dichroic, with a measured power of 32.8 mW/mm<sup>2</sup>.

The uM Workstation was controlled by the Python platform Acq4 (Campagnola et al. 2014), modified to perform fully automated electrophysiology ([www.acq4.org](http://www.acq4.org)). To generate fluorescence/voltage curves, the membrane potential was stepped from +50 to -110 mV in 20 mV increments from a resting potential of -70 mV (0.5 s baseline, 1 s step). For current clamp recordings, a short current pulse was injected (2 nA, 2 ms) to evoke APs.

Stimulus timing, baseline fluorescence calculation, background subtraction, and photobleaching correction was performed the same way as for the field stimulation assay. To identify responsive pixels, a Mann-Whitney U test was performed between the baseline and voltage step segments of the recording. The P value criterion to identify responsive pixels was empirically set to 1e-10.

The onset of each step was fit with the product of a rising and decaying exponential to capture the transient response (if any), summed with a single rising exponential to capture the steady-state response. The decay response was fit with a single exponential. Peak  $\Delta F/F_0$  as well as onset and decay kinetics were calculated at each voltage step as was done for field stimulation.

### **Imaging and whole-cell recording in brain slices**

All animal work was performed according to Institutional Animal Care and Use Committee approved protocols. Stereotaxic injections were made into right visual cortex (3.8 mm posterior and 3.0 mm lateral from bregma) of ~4-week-old Sst-IRES-Cre driver mice under isoflurane anesthesia. Two injections of 200 nL each of AAV2/1-syn-Flex-Voltron<sub>585</sub>-ST and AAV2/1-syn-Flex-Voltron<sub>2585</sub>-ST and were targeted to 300 and 600  $\mu$ m below the cortical surface.

Four weeks later, isoflurane anesthetized mice were transcardially perfused with ice-cold NMDG slicing solution containing (in mM): 98 HCl, 96 N-methyl-d-glucamine (NMDG), 2.5 KCl, 25 D-Glucose, 25 NaHCO<sub>3</sub>, 17.5 HEPES, 12 N-acetylcysteine, 10 MgSO<sub>4</sub>, 5 Na-L-Ascorbate, 3 Myo-inositol, 3 Na Pyruvate, 2 Thiourea, 1.25 NaH<sub>2</sub>PO<sub>4</sub>·H<sub>2</sub>O, 0.5 CaCl<sub>2</sub>, and 0.01 taurine. Acute 350  $\mu$ m parasagittal slices containing primary visual cortex from the right hemisphere were prepared with a Compressstome (Precisionary Instruments) in ice-cold NMDG slicing solution at a slice angle of 17° relative to the sagittal plane. Slices were incubated for 10min in NMDG slicing solution at 34°C and then transferred to artificial CSF (aCSF; in mM): 94 NaCl, 25 D-Glucose, 25 NaHCO<sub>3</sub>, 14 HEPES, 12.3 N-acetylcysteine, 5 Na-L-Ascorbate, 3 Myo-inositol, 3 Na Pyruvate, 2.5 KCl, 2 CaCl<sub>2</sub>, 2 MgSO<sub>4</sub>, 2 Thiourea, 1.25 NaH<sub>2</sub>PO<sub>4</sub> H<sub>2</sub>O, 0.01 Taurine. All solutions were maintained under constant carbogen (95% O<sub>2</sub>; 5% CO<sub>2</sub>).

To complete fluorescent labeling of Voltron-expressing cells, 1 nM of JF<sub>585</sub> was dissolved in 20  $\mu$ L dimethyl sulfoxide (DMSO) and 20  $\mu$ L of 20% Pluronic F-127 (w/w in DMSO). The solubilized dye was then added to 20 mL of oxygenated aCSF and incubated with the acute brain slices for 1h at room temperature, after which the slices were removed to a holding chamber (BSK 12, Scientific Systems Design) containing 500 mL oxygenated aCSF without dye. Slices were kept in this latter solution for at least one hour at room temperature prior to any experiment.

Slices were visualized using oblique (Olympus; WI-OBCD) infrared illumination using 20 $\times$  or 4 $\times$  objectives (Olympus). Recording pipettes were pulled from filamented borosilicate glass (Sutter Instruments) to a tip resistance of 3–8 M $\Omega$  using a DMZ Zeitz-Puller (Zeitz). Electrophysiology, image collection and subsequent analysis were performed using Acq4. Signals were amplified using Multiclamp 700B amplifiers (Molecular Devices) and digitized at 50–200 kHz using ITC-1600 digitizers (Heka). Neurons were held in whole-cell patch clamp with an internal solution containing (in mM): 130 K-gluconate, 10 HEPES, 0.3 ethylene glycol-bis( $\beta$ -aminoethyl ether)-N,N,N',N'-tetraacetic acid (EGTA), 3 KCl, 0.23 Na<sub>2</sub>GTP, 6.35 Na<sub>2</sub>Phosphocreatine, 3.4 Mg-ATP, 13.4 biocytin, and 50  $\mu$ M Cascade Blue dye.

Voltron<sub>585</sub>-associated fluorescence was examined using a 595 nm LED (Thorlabs) at 6.9  $\mu$ W/mm<sup>2</sup> power and 598/25 nm excitation and 650/54 nm emission filters (Semrock). Images were collected by sampling a 675  $\mu$ m  $\times$  137  $\mu$ m region of the slice with a digital sCMOS camera (Hamamatsu; Flash 4.0 V2) at 500 Hz and 4 $\times$ 4 pixel binning. Image analysis was performed by custom routines written in Python. For each camera frame, average fluorescence intensity over an elliptical region of interest (ROI) over neuropil adjacent to a cell was subtracted from an identically shaped region containing the cell itself. Synthetic post-synaptic potentials (synPSPs) of -15mV to +15mV in 5mV increments, repeated for a total of 10 trials per cell were injected in voltage clamp mode. Two adjacent 10 ms-long temporal windows prior to the onset of the current injection were designated as “noise” and “baseline” epochs, and a third 10 ms “signal” temporal window was centered over the fluorescence peak (from 4 ms to 14 ms after the onset of the change in membrane potential). The  $\Delta F/F$  was calculated for each trial as the average change in fluorescence between the “signal” and “baseline” windows. To determine SNR, the least-squares regression line for the  $\Delta F/F$  was used to determine the average change in signal per mV. The noise for this ratio was calculated by determining the standard deviation of the  $dF/F$  between the “noise” and “baseline” windows (when the membrane potential in the cell was held constant), and then dividing the signal per mV by that value. Thus, a value of 0.5 indicates that the fluorescence change associated with a 4 mV alteration in membrane potential is equal in magnitude to 2 $\times$  the st.dev. of fluorescence values during a period in which the membrane potential is unchanged.

### **Simultaneous voltage imaging and optogenetic stimulation in brain slices**

Voltron2 and Channelrhodopsin2 were expressed throughout the motor cortex using injections of a mixture of (1) rAAVretro-hSyn-Cre-WPRE (2 $\times$ 10<sup>9</sup> g.c.; Addgene #105553-AAVrg), (2) AAV1-Syn-FLEX-Voltron2<sub>585</sub>-WPRE (1 $\times$ 10<sup>9</sup> g.c.), (3) AAV8-Syn-ChR2(H134R)-GFP (3 $\times$ 10<sup>8</sup> g.c.; Addgene #58880-AAV8), and (4) 0.05% Trypan Blue in 1  $\mu$ L of sterile PBS into the lateral ventricle of C57Bl/6N mice (Charles River) at postnatal day 1 (Kim et al. 2014). At least 14 days following virus injection, mice were transcardially perfused with 15 mL of chilled and carbogen-bubbled (95% O<sub>2</sub>/5% CO<sub>2</sub>) NMDG aCSF solution (in mM: 92 NMDG, 2.5 KCl, 1.25 NaH<sub>2</sub>PO<sub>4</sub>, 30 NaHCO<sub>3</sub>, 20 HEPES, 25 glucose, 2 thiourea, 5 Na-ascorbate, 3 Na-pyruvate, 0.5 CaCl<sub>2</sub>·4H<sub>2</sub>O and 10 MgSO<sub>4</sub>·7H<sub>2</sub>O, pH 7.3-7.4, 300-310 mOsm). Acute slices through motor cortex were made in chilled NMDG



aCSF with constant bubbling (Ting et al. 2014). Following re-introduction of sodium in 37°C NMDG aCSF, slices were transferred to a holding chamber containing 25 nM JF<sub>585</sub> dye in 5 mL bubbled, room temperature HEPES aCSF buffer (in mM: 92 NaCl, 2.5 KCl, 1.25 NaH<sub>2</sub>PO<sub>4</sub>, 30 NaHCO<sub>3</sub>, 20 HEPES, 25 glucose, 2 thiourea, 5 Na-ascorbate, 3 Na-pyruvate, 2 CaCl<sub>2</sub>·4H<sub>2</sub>O and 2 MgSO<sub>4</sub>·7H<sub>2</sub>O, pH 7.3-7.4, 300-310 mOsm). Slices were incubated in dye solution for 1 hour, and moved to fresh HEPES aCSF for 1 hour to wash out excess dye. Experiments were performed at room temperature in HEPES aCSF solution. Whole-cell recordings were made using filamented glass pipettes (Sutter #BF150-86-10) pulled to 3-8 MΩ resistance (Sutter P-1000 Micropipette Puller), and intracellular recording buffer containing (in mM) 145 K-Gluconate, 10 HEPES, 1 EGTA, 2 Mg-ATP, 0.3 Na<sub>2</sub>-GTP, and 2 MgCl<sub>2</sub> (pH 7.3, 290-300 mOsm). A patch-clamp headstage (Molecular Devices #1-CV-7B) mounted on a motorized 4-axis Siskiyou MX7600 manipulator, and Axon Instruments MultiClamp 700b amplifier were used for all recordings.

Imaging was performed using a custom-built confocal microscope at a frame rate of 458 Hz using a 16X/0.8 NA water-immersion objective lens (Nikon CF175 LWD 16X W). High frame rates were achieved using a system similar to that described previously (Badon et al. 2019) but with a 128-facet polygonal scanner (Cambridge Technology SA34) substituted for the x-axis scanner. Voltron<sub>2585</sub> was excited with a 561 nm laser diode (Vortran Stradus). The time-averaged irradiance at the sample was 33 mW/mm<sup>2</sup> and fluorescence was epi-collected with a dichroic mirror and emission filter (Chroma T570lpxr and ET570lp), and detected with a silicon photomultiplier (Hamamatsu S14420-1550MG, V<sub>BIAS</sub> = 50 V) and amplified on-board with a custom circuit (<https://github.com/tweber225/simple-sipm>). A blue LED (Thorlabs M470L4) was used to provide full-field ChR2 stimulation. The LED was filtered and coupled into the confocal beam path with an excitation filter and dichroic mirror (Thorlabs MF475-35 and DMLP505R). Additionally, the LED was attenuated such that the desired irradiance levels (10-50 μW/mm<sup>2</sup>) were within the analog control range of the LED driver (Thorlabs LEDD1B). Image acquisition and stimulus timing were managed with ScanImage (Pologruto et al. 2003) and WaveSurfer (<https://wavesurfer.janelia.org/>).

### **Lattice lightsheet imaging in zebrafish**

*In vivo* light sheet microscopy of zebrafish was performed as previously described (Liu et al. 2018). Briefly, zebrafish transgenic lines expressing soma-tagged Voltron (Tg[vglut2a:Gal4; UAS:Voltron<sub>552</sub>-ST]) and Voltron<sub>2</sub> (Tg[vglut2a:Gal4;UAS:Voltron<sub>2552</sub>-ST]) were generated. At three days post-fertilization (dpf), fish were incubated in a water solution containing 3 μM JF<sub>552</sub> for 2 h. The fish at 4 to 6 dpf were then paralyzed by a-bungarotoxin (1 mg/mL) and mounted in low melting point agarose for imaging. The custom microscope used for imaging was described previously (Liu et al. 2018). Here it was used without the adaptive optics (AO) subsystem since optical aberration was negligible in the structure we imaged. A 740 nm thick light sheet was created from a 560 nm laser source using a multi-Bessel lattice with an outer and inner NA of 0.38 and 0.36, respectively, for a measured power of 100 μW at the back pupil of the excitation objective. Single-plane imaging was performed at an effective 108 x 108 nm XY resolution, with an FOV of 256x512 pixels, at a framerate of 400 Hz. Approximately 4-10 Voltron-expressing neurons were present in each field of view. Fluorescent signal was recorded for 5 min. For analysis, the automated voltage imaging analysis package Volpy was used (Cai et al. 2020). To perform an unbiased comparison of Voltron<sub>552</sub> and Voltron<sub>2552</sub> populations, every spiking cell detected by Volpy was included in the analyzed dataset, irrespective of AP

amplitude.  $\Delta F/F_0$  and SNR for each cell were calculated by Volpy. For SNR calculations, the noise was defined as the standard deviation of the residual after subtracting spike and subthreshold components, as detected by Volpy.

### **Voltron imaging in adult flies**

Experiments were performed as described previously (Abdelfattah et al. 2019). Briefly, crosses of Voltron<sup>552</sup> (*UAS-IVS-syn21-Ace2NHalo-p10* Su(Hw)attP8) or Voltron<sup>2552</sup> (*UAS-IVS-syn21-Ace2N(A122D)Halo-p10* Su(Hw)attP8) reporters with split Gal4 drivers were raised on standard cornmeal food supplemented with all-trans-retinal (0.2 mM before eclosion and then 0.4 mM). 2- to 10-day old female progeny were collected for experiments. To prepare the fly for imaging, a small hole was dissected in the head capsule, and air sacs and fat tissue were removed but we did not intentionally remove the perineural sheath. The exposed brain was then bathed in a drop (~200  $\mu$ L) of dye-containing saline (1  $\mu$ M for JF<sub>552</sub>-Halotag ligand) for 1 hr. Saline contains (in mM): NaCl, 103; KCl, 3; CaCl<sub>2</sub>, 1.5; MgCl<sub>2</sub>, 4; NaHCO<sub>3</sub>, 26; N-tris(hydroxymethyl)methyl-2-aminoethanesulfonic acid, 5; NaH<sub>2</sub>PO<sub>4</sub>, 1; trehalose, 10; glucose, 10 (pH 7.3 when bubbled with 95% O<sub>2</sub> and 5% CO<sub>2</sub>, 275 mOsm). The dye was then washed-out by rinsing three times with ~10 mL of fresh saline each time over a 1-hr period. Imaging was performed on a widefield fluorescence microscope (SOM, Sutter Instruments) equipped with a 60x, NA 1.0, water-immersion objective (LUMPlanFI/IR; Olympus) and an sCMOS camera (Orca Flash 4.0 V3, Hamamatsu). Images were acquired at 800 frames per second with 4x4 binning through the Hamamatsu imaging software (HCLImage Live). For JF<sub>552</sub>, illumination was provided by a 561-nm LED (SA-561-1PLUS, Sutter) with an excitation filter (FF01-549/12-25, Semrock); intensity at the sample plane was 2-11 mW/mm<sup>2</sup> for typical recordings. Emission was separated from excitation light using a dichroic mirror (FF562-Di03-25x36, Semrock) and an emission filter (FF01-590/36-25, Semrock). We found that JF<sub>552</sub> allows for longer-duration imaging compared with JF<sub>549</sub> and JF<sub>525</sub>, which we used previously (Abdelfattah et al. 2019). At the aforementioned illumination levels, spiking activity was detectable for over 20 min in PPL1- $\gamma$ 1pedc and over 10 min in MBON- $\gamma$ 1pedc $\alpha/\beta$ .

For MBON- $\gamma$ 1pedc $\alpha/\beta$ , both left and right hemispheres were sampled, while for PPL1- $\gamma$ 1pedc, whose axons project bilaterally, only one hemisphere was imaged. Each experiment at one illumination level consists of a recording of 15 s. Data were analyzed with custom-written scripts in MATLAB (Mathworks). Regions of interest (ROIs) corresponding to the  $\gamma$ 1 region were manually selected, and the mean pixel intensity within the ROI was calculated. The raw fluorescence trace was de-trended by median filtering with a 50 ms time window.  $F_0$  was calculated from the filtered trace as the mean over the first 1 s of imaging session. Spike sorting and SNR quantification were performed on the de-trended trace. Spikes were automatically detected by finding local minima and verified by visual inspection. SNR was quantified as peak amplitude over the standard deviation of the trace excluding a 50 ms time window around any spikes.

### **Imaging Parvalbumin (PV) neurons in mouse hippocampus**

Hippocampal PV neuron imaging was performed using adult PV-Cre mice (JAX 008069). The imaging window was implanted using procedures similar to those previously described (Dombeck et al. 2010). In short, a

circular craniotomy (3 mm diameter) was made centered at 2.0 mm caudal and 2.0 mm lateral to bregma. The surface of CA1 was exposed by gently removing the overlying cortex with aspiration. AAV2/1-syn-FLEX-Voltron<sub>552</sub>-ST (Voltron<sub>552</sub>; 4 mice) and either AAV2/1-syn-FLEX-Voltron<sub>2552</sub>-ST (2 mice) or AAV2/1-CAG-FLEX-Voltron<sub>2552</sub>-ST (Voltron<sub>2552</sub>, 3 mice) virus was diluted to  $1.4 \times 10^{13}$ ,  $4.1 \times 10^{13}$  and  $8.26 \times 10^{11}$  GC/mL, respectively. Diluted viruses were injected at four locations (separated by 700  $\mu$ m, 50 nL per location) at a depth of 200  $\mu$ m from CA1 surface (injection rate, 1 nL/s). The imaging window (constructed by gluing a 3 mm diameter cover glass to a stainless steel cannula of 3 mm diameter and 1.5 mm height) was placed onto the hippocampus and glued to the skull using super-bond C&B (Sun Medical). A titanium head bar was glued to the skull for head fixation during imaging.

Imaging experiments started 3 weeks after surgery. 100 nM of JF<sub>552</sub> were dissolved in 20  $\mu$ L of DMSO (Sigma) and diluted in 20  $\mu$ L Pluronic™ F-127 (20% w/v in DMSO, P3000MP, Invitrogen) and in 80  $\mu$ L PBS. The dye solution was delivered using retro-orbital injection (Yardeni et al. 2011) with a 30 gauge needle. Three hours after dye injection, animals were placed under the microscope and labeled PV+ cells (47 – 137  $\mu$ m deep) were illuminated using a 532 nm laser (Opus 532, Laser Quantum) through an excitation filter (FF02-520-28, Semrock). Fluorescence was collected using a 16X/0.8 NA objective (Nikon), separated from excitation light using a dichroic mirror (540lpxr, Chroma) and an emission filter (FF01-596/83, Semrock), and imaged onto a CMOS camera (DaVinci-1K, RedShirt) using a 50mm camera lens (Nikkor 50mm f1.2, Nikon) as the tube lens. For patterned illumination, the laser beam was expanded using a pair of lenses (C280TMD-A and AC254-150-A, Thorlabs) and directed to a digital micromirror device or DMD (V7000, ViALUX). The DMD was imaged to the sample using an 80 mm lens (AC254-080-A, Thorlabs) and the microscope objective. A reference image of labeled cells was first acquired using widefield illumination. Bright and in-focus neurons were selected manually and their coordinates were used to generate an illumination mask consisting of 64  $\mu$ m diameter discs centered on each selected cell. The illumination intensity was  $\sim 70$ -140 mW/mm<sup>2</sup> (i.e.  $\sim 0.22$  - 0.45 mW per cell) at the sample plane. Images (190 x 160 pixels, corresponding to an area of 1.4 x 1.2 mm) were collected at 2000 Hz using Turbo-SM64 software (Sci-Measure) for three minutes (360,000 images).

Brain motion was corrected using rigid registration. The fluorescence  $F(t)$  of each cell was measured by averaging pixel values within a 10-pixel region covering the cell body. To correct for bleaching and other slow fluctuations, a baseline fluorescence trace  $F_0(t)$  was computed from  $F(t)$  by a moving average with 1s windows. Since Voltron fluorescence decreases with membrane depolarization, we define  $\Delta F/F_0(t) = -(F(t) - F_0(t))/F_0(t)$  as an estimate of cells' membrane potential. To detect APs, a high pass filtered version of  $\Delta F/F_0$ ,  $(\Delta F/F_0)_{hp}$ , was computed by subtracting a median-filtered (5 ms window)  $\Delta F/F_0$ . Positive peaks of the  $(\Delta F/F_0)_{hp}$  trace were detected and considered as candidate spike locations (with  $t_k$  and  $p_k$  being the locations and the amplitudes, respectively, of the  $k^{\text{th}}$  candidate peak). To choose a threshold, the distribution of  $p_k$ ,  $P(x)$ , was estimated by kernel density method ('ksdensity' function in MATLAB). The same procedure was applied to the inverted  $(\Delta F/F_0)_{hp}$  trace to detect 'noise' peaks, and the amplitudes of those peaks were used to construct a noise distribution,  $P_{\text{noise}}(x)$ . The distribution of spike amplitudes was estimated as  $S(x) = P(x) - P_{\text{noise}}(x)$ , and a threshold value  $th1$  was chosen at the location where  $S(th1) = P_{\text{noise}}(th1)$  in order to minimize the sum of type I and type II error. This approach works well in cells with good signal to noise ratio (SNR), but in low SNR cells it often leads to substantial false positive detections. We estimated the number of false positive detections ( $nFP$ ), at any given threshold value, by counting the number supra-threshold 'noise' peaks in the inverted  $(\Delta F/F_0)_{hp}$  trace. If  $nFP$  at  $th1$  exceeds 18 over the 180 s recording period (i.e. false positive rate  $> 0.1$ Hz), the threshold was replaced by a higher value,  $th2$ , that allowed a maximum of 18 false positive detections. Candidate peaks larger than the threshold were used for an initial estimate of spike times, and segments of the  $(\Delta F/F_0)_{hp}$  trace around these peaks were averaged to generate an initial estimate of the AP waveform,  $AP(t)$ . Since AP waveforms exhibit finite rise and decay times, the occurrence of a spike interferes with the detection of spikes

within its immediate neighborhood. To correct for this effect, if a candidate peak  $p_i$  was surrounded by a larger peak  $p_j$  within  $\pm 2$  ms, its amplitude was corrected by assuming that a spike occurred at  $t_j$  and by subtracting the contribution of that spike, i.e.  $p_{i,\text{corrected}}=p_i-AP(t_i-t_j)$ . This procedure was used to correct the amplitudes of all candidate peaks. Finally, a candidate peak was detected as an AP if its corrected amplitude exceeded the above mentioned threshold.

To quantify the recording quality and the fidelity of spike detection, we first estimated the spike amplitude  $A$  by averaging the amplitudes of all detected spikes. The noise of the recording  $\sigma$  was estimated as the standard deviation of the  $(\Delta F/F_0)_{\text{hp}}$  trace excluding regions 2 ms before and 4 ms after each detected spike. The signal to noise ratio was measured for each cell as  $\text{SNR}=A/\sigma$ . A cell was included into our analysis if (1) its SNR exceeded 5, (2) the number of detected spikes in the cell exceeded 90 (i.e. spike rate  $> 0.5$  Hz), (3) less than 1% of detected spikes had an inter-spike-interval less than 2.0 ms, and (4) the half-width of the spike waveform was shorter than 0.85ms. To compare the density of labeled neurons, a z-stack of images was acquired at the end of the recording session and cell bodies in a  $1280 \times 1280 \times 200 \mu\text{m}^3$  volume were counted manually.

### **Imaging in mouse visual cortex**

All procedures were approved by the Institutional Animal Care and Use Committee at the Second Faculty of Medicine, Charles University in Prague. The procedures were carried out in accordance with the relevant guidelines and regulations.

Layer 2/3 pyramidal neurons in the visual cortex of mice (C57Bl/6NCr; Charles River Laboratories) were sparsely labeled with the indicators – either Voltron<sub>525</sub>-ST or Voltron<sub>2525</sub>-ST. We prepared four mice per group. In an anesthetized mouse (isoflurane in pure oxygen; 4% for induction, 1–2% for maintenance), we first glued a ring-shaped titanium headbar to the skull of the animal using a gel-form cyanoacrylate and then fully closed the skin around the headbar. A craniotomy (4.5 mm in diameter) was drilled over the left parietal cortex, centered on -2.5 mm lateral, +0.5 mm anterior from lambda (visual cortex). Using beveled, pulled-glass capillaries (tip size  $< 12 \mu\text{m}$ ), we injected a mixture of two viruses: high-titer AAV carrying the cassette for conditional expression of the voltage indicator (AAV2/1-syn-FLEX-Voltron<sub>525</sub>-ST or AAV2/1-syn-FLEX-Voltron<sub>2525</sub>-ST; titer  $10^{12}$  GC/mL) and low-titer AAV carrying the transcription permissive signal (AAV9-CamKIIa-Cre; titer  $10^8$  GC/mL). Six to eight 40 nL injections at a depth of 150  $\mu\text{m}$  were performed in each mouse. The craniotomy was coverslipped and the cranial window was secured using cyanoacrylate. A standard analgesia protocol (ketoprofen) followed. Approximately seven weeks after surgery, the animal was prepared for imaging. One day prior to imaging, JF<sub>525</sub> dye was administered intravenously. To prepare the JF dye for injection, 100 nM of lyophilized JF<sub>525</sub> was dissolved in 20  $\mu\text{L}$  of DMSO, 20  $\mu\text{L}$  Pluronic F-127 (20% w/v in DMSO), and 60–80  $\mu\text{L}$  of PBS. Mice were briefly anesthetized and 100  $\mu\text{L}$  of the dye solution was injected into the retro-orbital sinus of the right eye using a 30-gauge needle. We used the same design of wide-field fluorescence microscopy with structured illumination as described in (Abdelfattah et al. 2019). Illumination was delivered using a 525 nm LED (Mightex, LCS-0525-60-22) and shaped using a digital mirror device (Texas Instruments, LightCrafter). The microscope was equipped with a water immersion objective (20X, NA 1.0, Olympus XLUMPLFLN) and a CMOS camera (Hamamatsu Orca Flash v3). Excitation and emission were separated using a standard filter cube (Chroma 49014; excitation 530/30, dichroic 550, emission 575/40). The illumination was restricted to single neurons using DMD. The illuminated spot was 80  $\mu\text{m}$  in diameter and the intensity was kept at 18.5 mW/mm<sup>2</sup> in the sample plane. Small fields of view (40  $\mu\text{m}$  X 40  $\mu\text{m}$ ) containing



single neurons were typically captured. Native 2048x2048 resolution of the camera was binned by a factor of 4. During imaging, we recorded only from neurons that produced at least ~120 photons per frame and per pixel as this was expected to lead to approximately 1% standard deviation of the raw signal (quantum efficiency of the camera 82%, neuron covered with ~100 pixels, noise dominated by shot noise). Three-minute time series at 500 frames per second were captured for most of the recordings; one minute at 1000 frames per second was used only for comparison of AP-related fluorescence changes. Mice were imaged fully awake without any visual stimulation.

To process the recordings, we first removed the in-plane motion artifacts using the fast rigid registration algorithm NoRMCorre (Pnevmatikakis and Giovannucci 2017). Neurons ( $n = 107$  expressing Voltron<sub>525</sub>-ST in 4 mice,  $n = 102$  expressing Voltron<sub>2525</sub>-ST in 4 mice) were then segmented manually. The signal was taken as the mean intensity over the region of the interest. The in vitro data showed a substantial difference in brightness of the two indicators. Since voltage-independent background autofluorescence (presumed to also be independent of the chosen indicator) would comprise different fractions of the signal and decrease the observed relative fluorescence changes, we subtracted the mean intensity of the neuropil surrounding each particular neuron from its signal ( $I_n$ ). To detrend the signal and extract the fluorescence changes related to both APs and slower membrane voltage changes (EPSPs, oscillations), we calculated a baseline ( $B_{5s}$ ) using a 5s median filter. The  $\Delta F/F$  trace was then defined as  $\Delta F/F = 100 \cdot (I_n - B_{5s}) / B_{5s}$ . To extract only the AP-related fluorescence spikes, we calculated another baseline ( $B_{20}$ ) using a 20 ms median filter;  $\Delta F/F_{APs} = 100 \cdot (I_n - B_{20ms}) / B_{20ms}$ . We estimated the noise directly from the  $\Delta F/F_{APs}$  trace. Based on the fact that the AP-related spikes are all negative-going and APs are generally sparse, positive values of the trace  $\Delta F/F_{APs}$  can be considered as noise. We removed all negative data points and then randomly assigned positive/negative signs to the rest of the points. We calculated the standard deviation of these values ( $SD_{noise}$ ) for each neuron and set it as a threshold to detect spikes;  $THR = -4 \cdot SD_{noise}$ . If the threshold was crossed at two neighboring time points, such doublet was considered as a single AP, the time point with higher amplitude was chosen by the algorithm and the spike was ascribed to this time point. Using four standard deviations leads to false positivity rate of 1–2 false spikes per minute in our recordings.

To detect the periods of 3–5 Hz oscillations, we applied a bandpass filter (3–5Hz, MATLAB [bandpass]) to the  $\Delta F/F$  trace and then detected the pronounced oscillations as outliers from the values' variance. The bandpassed trace was thresholded by  $3 \cdot MAD$  (median absolute deviations) using the MATLAB function [isoutlier]. Absolute values of these outliers were averaged for each neuron and later averaged over all neurons in both groups.

## Results

### High throughput screening of Voltron mutants in neuron culture

Voltron variants were generated using site saturation mutagenesis (SSM) performed at 40 positions within the rhodopsin domain. All screening was performed on Voltron mutants labeled with JF<sub>525</sub> (Voltron<sub>525</sub>). Positions were chosen based on: (1) previous reports of analogous positions in other opsins that affected their thermal stability (Curnow et al. 2011; Faham et al. 2004; Mclsaac et al. 2014; Perálvarez-Marín et al. 2008; Wagner et al. 2013), (2) amino acids in close proximity to the retinal chromophore that we reasoned might affect the



environment of the Schiff base, or (3) positions that were found to be important in mutagenesis of Archaelhodopsin into a voltage sensor (Hochbaum et al. 2014) (Fig 1a). We performed two rounds of screening (Fig. 1b). In the first, we screened individual point mutations using a field stimulation assay in primary neuron cultures (Fig. 1c-e). For each variant, parameters relevant to the performance of the sensor *in vivo* were measured: AP sensitivity ( $\Delta F/F_0$ ), AP rise and decay kinetics ( $\tau_{ON}$  and  $\tau_{OFF}$ ), and baseline fluorescence ( $F_0$ ). To control for biological variability, the measured parameters of each construct were also normalized to an in-plate Voltron<sub>525</sub> control. The control was also used to monitor the quality and consistency of the screen. For a construct screened in a 96-well plate, results were discarded if at least one of the following quality control (QC) criteria (empirically determined) were violated: (1) the average  $|\Delta F/F_0|$  of the in-plate Voltron<sub>525</sub> controls was  $< 3.6\%$ , (2) the PDI of the plate was  $> 30\%$  (see Methods), or (3) the construct had  $< 100$  pixels with a significant change in  $\Delta F/F_0$  during the stimulation (“responsive pixels”).

Of the 2,727 variants that were screened in 199 plates, 2,314 (84%) passed the above QC criteria. Variants that failed QC were re-screened again and 34% of them passed QC on the second round of screening and were added to the main QC-passed pool. The majority (66%) of the libraries were then sequenced and results from the same mutation were grouped, resulting in 819 QC-passing mutants. We found 422 mutants (51%) with significantly improved  $\Delta F/F_0$ , 310 mutants (38%) with increased SNR, 233 mutants (27%) with reduced  $\tau_{ON}$ , 256 mutants (31%) with reduced  $\tau_{OFF}$ , and 307 (37%) with increased  $F_0$  compared to Voltron (Fig. 1f,  $P < 0.01$ , Mann-Whitney  $U$  test). The key feature of Voltron we desired to optimize was  $\Delta F/F_0$ ; therefore, we ranked all variants based on  $|\Delta F/F_0|_{\max}$  (maximum of  $|\Delta F/F_0|$ ) normalized to in-plate Voltron controls.

Although many variants had improved  $|\Delta F/F_0|_{\max}$  over Voltron<sub>525</sub>, there was no single top-performing variant in this first round of screening. Instead, the difference in  $|\Delta F/F_0|_{\max}$  of the top 3 variants was only  $\sim 10\%$ , which was under our PDI metric ( $14 \pm 5.2\%$  across the first screening round), indicating that the ranking of the top variants may not be accurate. The top two hits in the screen were Voltron<sub>525</sub>.V74G ( $|\Delta F/F_0|_{\max}$  relative to Voltron<sub>525</sub> = 2.28) and Voltron<sub>525</sub>.V74W ( $|\Delta F/F_0|_{\max}$  relative to Voltron<sub>525</sub> = 2.21; Fig. 1g, Supplementary Table 1). However, subsequent analysis with patch-clamp revealed that Voltron<sub>525</sub>.A122D (3<sup>rd</sup> in the ranked  $|\Delta F/F_0|_{\max}$  list,  $|\Delta F/F_0|_{\max}$  relative to Voltron<sub>525</sub> = 2.18) had superior properties as a voltage sensor. The Voltron<sub>525</sub>.A122D mutant (which we named Voltron<sub>2525</sub>) exhibited  $|\Delta F/F_0|_{\max}$  and SNR that was 52% and 25%, respectively, higher than Voltron<sub>525</sub> (Fig. 1 h,i).

The first-round SSM screen revealed many mutations that moderately increased  $\Delta F/F_0$ . We therefore embarked on a second round of combinatorial (combo) screening, hoping that combining 13 of the top performing mutations (Y63L, N69E, V74E/W, R78H, N81S, L89A/C/G/T, A122D/H, V196P) would further improve the sensor. Of the 1,232 constructs screened in 106 plates, 77% passed QC. Surprisingly, only 28 of 848 combo mutants (3.3%) had significantly improved  $|\Delta F/F_0|_{\max}$  over Voltron<sub>2525</sub> ( $P < 0.01$ , Mann-Whitney  $U$  test; Supplementary Fig. 1, Supplementary Table 2). Similarly, only a few variants had increased SNR (20 of 848, 2.4%). The A122D substitution was present in 34% of the combo variants passing QC (Supplementary Table 3); nevertheless, the combo screen revealed that combining it with other mutations resulted in less sensitive variants. Subsequent automated patch-clamp analysis confirmed that Voltron<sub>2525</sub>, containing the sole A122D substitution, outperformed all combo mutants (Supplementary Fig. 4).

## **Screening and characterization with automated whole-cell electrophysiology**

Many single and combo mutation hits from the neuron culture screen had improved  $|\Delta F/F_0|_{\max}$  over Voltron but had very similar  $\Delta F/F_0$  characteristics among them. We deemed the field stimulation screen to be insufficiently sensitive to find the one variant with the best performance, so we used the uM Workstation, a fully automated whole-cell electrophysiology platform based on the PatcherBot to perform a secondary screen on top single and combinatorial mutant hits.

We first validated the throughput and performance of the automated electrophysiology platform. To mimic a small-scale screen, 10 35-mm Mattek dishes of cultured neurons were transfected with variants of the voltage sensor ASAP (St-Pierre et al. 2014). The uM Workstation made 103 patch-clamp attempts in 7.1 hours, with a 78% whole-cell success rate. The system operated unattended for ~5 hours during that day of screening. Thus, the uM Workstation allowed us to screen ~10 constructs per day, assuming 5-10 neurons per construct.

The uM Workstation achieves high throughput by automatically cleaning and reusing patch-clamp pipettes (Fig. 2a); however, it is conceivable that the cleaning process is imperfect and whole-cell success rate degrades over subsequent attempts. To address this, we evaluated pipette performance after multiple patch-clamp attempts. Whole-cell success rate decreased over time, but likely due to cell health degradation, not due to an accumulation of debris on the reused pipette, since replacing the pipette did not recover the success rate (Supplementary Fig. 2a). In a separate experiment we replaced the dish without replacing the pipette, and found that the success rate recovered, further suggesting that cell health degradation, not pipette debris is responsible for the apparent decrease in success rate (Supplementary Fig. 2b). To explore the limits of pipette cleaning, we patch-clamped cells with the same pipette, replacing the plate as needed, until the time to form a gigaohm seal increased, indicating a contaminated pipette. Consistent with previous observations, a single pipette could be used for patch-clamping ~50 neurons (Kolb et al. 2019) (Supplementary Fig. 2c). Last, we evaluated the quality of the recordings and found 85.6% (143 out of 167) of the successful whole-cell recordings had a holding current greater than  $-100$  pA and access resistance less than  $30$  M $\Omega$ , which meets the criteria for most of the published data acquired with manual patch clamp. Together, we found that the automated uM Workstation successfully increased our throughput, enabling large-scale patch-clamp studies, without compromising data quality.

Using the uM Workstation we then screened top-performing single-position mutants from the field stimulation screen, including Voltron as a control. While Voltron<sub>525</sub>.V74G and Voltron<sub>525</sub>.V74W were the top performers from the field stimulation screen, their fluorescence response to a 100 mV voltage step was lower than that of Voltron<sub>2525</sub> (Fig. 2b). The other mutants were also 8% to 55% less sensitive to 100 mV voltage steps than Voltron<sub>2</sub> (Supplementary Fig. 3). Meanwhile, Voltron<sub>2525</sub> was found to be 65% more sensitive than Voltron, consistent with the field stimulation screen. Furthermore, in the physiologically relevant sub-threshold voltage range (-90 to -50 mV), Voltron<sub>2525</sub> exhibited a significantly steeper slope than Voltron<sub>525</sub> ( $0.54 \pm 0.01$  and  $0.21 \pm 0.01$ %/mV, respectively;  $P = 0.0009$ , Mann-Whitney U test), making it a higher-fidelity optical reporter of changes in sub-threshold membrane potential.

Surprisingly, the combo mutation screen (second round of the field stimulation assay, Fig. 1b) yielded few variants with improved sensitivities. We nevertheless screened the 34 variants with sensitivities marginally better than Voltron<sub>2525</sub> using the uM Workstation. As was the case with the single-position mutants, we found no combo mutants that out-performed Voltron<sub>2525</sub> (Fig. 2c, Supplementary Fig. 4). Therefore, for the remainder of this study, we focused on characterization of Voltron<sub>2525</sub>.

Voltron<sub>2525</sub> exhibited fast onset and decay kinetics that were best fit with a double exponential (Fig. 2d). Interestingly, the A122D mutation completely eliminated the transient peak in the fluorescence response of Voltron<sub>525</sub> (Fig. 2b inset). The fast component of the onset and decay kinetics was slightly shorter for Voltron<sub>2525</sub> (onset:  $0.67 \pm 0.03$  ms, decay:  $0.89 \pm 0.09$  ms) compared to Voltron<sub>525</sub> (onset:  $0.85 \pm 0.06$  ms, decay:  $1.13 \pm 0.08$  ms), though not significantly different. The slow components were likewise similar between the two sensors (Voltron<sub>525</sub>: onset  $3.26 \pm 0.47$  ms, decay  $6.27 \pm 1.41$  ms; Voltron<sub>2525</sub>: onset  $4.76 \pm 0.92$  ms, decay  $4.74 \pm 0.32$  ms). The fast component of Voltron<sub>2525</sub> accounted for a larger percentage of the overall response in the onset but not decay response (Fig. 2e). Overall, the kinetic properties of Voltron<sub>525</sub> and Voltron<sub>2525</sub> were found to be similar.

Consistent with the improved sensitivity of Voltron<sub>2525</sub> in response to voltage steps, it was also superior in its sensitivity to APs. Voltron<sub>2525</sub> reported single APs with  $\Delta F/F_0$  of  $10.09 \pm 1.47\%$ , significantly higher than for Voltron<sub>525</sub> ( $6.16 \pm 0.74\%$ , Fig. 2 f,g). The baseline fluorescence of Voltron<sub>2525</sub> was  $\sim 30\%$  lower than Voltron<sub>525</sub>, which may be beneficial in some experiments but detrimental in others (Fig. 2h). The same trend was observed with the addition of the soma localization tag (Supplementary Fig. 5). Nevertheless, both Voltron<sub>2525</sub> and Voltron<sub>2525</sub>-ST showed good membrane localization, qualitatively similar to their Voltron counterparts (Supplementary Fig. 6, 7). The addition of a soma localization tag to Voltron<sub>2525</sub> increased its sensitivity to a 100 mV depolarization pulse by  $\sim 18\%$  (Supplementary Fig. 8). In culture, Voltron<sub>2525</sub> photobleached slightly, but not significantly, slower than Voltron<sub>525</sub> (Voltron<sub>525</sub>:  $45 \pm 2\%$ , Voltron<sub>2525</sub>:  $41 \pm 1\%$  reduction in fluorescence;  $P=0.11$ , Mann-Whitney U test; Fig. 2i).

We reasoned that the A122D mutation responsible for the increased sensitivity of Voltron<sub>2525</sub> could have beneficial properties when grafted onto other Ace rhodopsin-based GEVIs. We tested this hypothesis in Ace2N-mNeon and VARNAM. As expected, adding the A122D mutation to both GEVIs increased their sensitivity to depolarizing and hyperpolarizing voltage pulses (Supplementary Fig. 9). Similar to Voltron<sub>2525</sub>, A122D significantly increased the slope of the sensors in the sub-threshold range (Ace2N-mNeon:  $0.091 \pm 0.012$  %/mV, Ace2N-mNeon.A122D:  $0.303 \pm 0.012$  %/mV,  $P=0.006$ ; VARNAM:  $0.104 \pm 0.012$  %/mV, VARNAM.A122D:  $0.147 \pm 0.010$  %/mV,  $P=0.045$ ; Mann-Whitney U test). The mutation eliminated the transient peak from VARNAM but not from Ace2N-mNeon. Grafting A122D onto Positron did not result in increased sensitivity (Supplementary Fig. 10); however this was not surprising given that the proton transport pathway in Positron is different from Voltron (Abdelfattah et al. 2020). Together, the results suggest that the A122D mutation appears to generalize across different FRET donors.

### **Voltage imaging and stimulation in acute brain slices**

The high sensitivity of Voltron2 in the sub-threshold range of voltages should make it a suitable GEVI for detecting low-amplitude voltage fluctuations, such as those arising as a result of synaptic activity. To test this, synthetic PSPs (synPSPs) were injected into neurons expressing Voltron<sub>585</sub> and Voltron<sub>2585</sub> in acute mouse brain slices (Fig. 3a). Optically captured responses to PSPs were  $\sim 40\%$  larger for Voltron<sub>2585</sub> than Voltron<sub>585</sub>, consistent with the improved sensitivity of Voltron<sub>2585</sub> in the sub-threshold range (Fig. 3b,c). The overall  $\Delta F/F_0$  in response to  $\pm 15$  mV synPSPs was  $5.9\%$  for Voltron<sub>2585</sub>, compared to  $3.2\%$  for Voltron<sub>585</sub> (Fig. 3d top). Due to the increased sensitivity, the detectability of synPSPs was found to be significantly improved for Voltron<sub>2585</sub> (Fig. 3d bottom). Together, we found that Voltron<sub>2585</sub> could be used to image millivolt-scale synaptic events.

We then evaluated the ability of Voltron2 to be used in the context of all-optical electrophysiology. Here, we expressed Voltron2<sub>585</sub>-ST along with ChR2-GFP (Boyden et al. 2005) in acute slices of mouse motor cortex (Fig. 4a). We confirmed with whole-cell electrophysiology that ChR2 could reliably elicit spiking activity when illuminated with moderate blue light intensity (30  $\mu\text{W}/\text{mm}^2$ ) and that Voltron2<sub>585</sub> accurately tracked the membrane voltage. Increasing the green excitation light intensity improved the SNR as expected but resulted in well-documented cross-excitation issues (Klapoetke et al. 2014; Packer et al. 2015) (Fig. 4b). Using the same illumination intensity, we imaged a FOV with 10 neurons during repeated ChR2 activation and found robust Voltron2<sub>585</sub> signals that reported expected increases in spiking activity during ChR2 stimulation (Fig. 4c,d). These experiments suggest that Voltron2<sub>585</sub> can be used with optogenetic actuators for all-optical interrogation of brain circuitry.

### **In vivo voltage imaging of olfactory sensory neurons in zebrafish**

We next tested Voltron2<sub>552</sub> side-by-side with Voltron in olfactory sensory neurons in larval zebrafish using a lattice lightsheet microscope (Fig. 5a). Voltron2<sub>552</sub> exhibited higher-amplitude spontaneous spiking and subthreshold activity than Voltron<sub>552</sub> (Fig. 5b). The  $\Delta F/F_0$  and SNR of detected spikes was significantly higher for Voltron2<sub>552</sub>, measured across hundreds of cells (Fig. 5c). Both Voltron2<sub>552</sub> and Voltron<sub>552</sub> were imaged over 5 minutes, with voltage signals still clearly visible at the end of the experiment, suggesting that longer recording sessions are also possible.

### **In vivo voltage imaging in adult *Drosophila melanogaster***

We tested Voltron2 in voltage recordings of spontaneous activity from two neuron types in the mushroom body (MB) circuit of adult *Drosophila melanogaster*, the output neuron MBON- $\gamma 1\text{pedc}>\alpha/\beta$  and the dopaminergic neuron PPL1- $\gamma 1\text{pedc}$  (Aso et al. 2014). The expression of Voltron2 was driven by split Gal4 lines (*MB112C* and *MB320C*), which uniquely target these neurons, enabling a well-matched comparison of sensor performance across different flies. We imaged both cell types in the  $\gamma 1$  compartment, which contains the dendritic processes of MBON- $\gamma 1\text{pedc}>\alpha/\beta$  and the axonal terminals of PPL1- $\gamma 1\text{pedc}$ . We used JF<sub>552</sub>-HaloTag conjugate (Fig. 6a). Among several JF dyes we tried in *Drosophila* neurons, we found that JF<sub>552</sub> allowed for prolonged Voltron imaging, which in PPL1- $\gamma 1\text{pedc}$  can last over 20 min without significant deterioration of the health of the cell (unpublished observations, YS). JF<sub>552</sub> is a JF<sub>549</sub> analogue with fluorine substitution on the xanthene ring, which shows improved cell and tissue permeability (Zheng et al. 2019). Spike amplitudes ( $\Delta F/F_0$ ) measured with Voltron2<sub>552</sub> were significantly larger when compared to Voltron<sub>552</sub> (Fig. 6b,d). The mean spike size is 74% larger in MBON- $\gamma 1\text{pedc}>\alpha/\beta$  (Fig. 6c), and 57% larger in PPL1- $\gamma 1\text{pedc}$  (Fig. 6e). The SNR is also increased, most notably in MBON- $\gamma 1\text{pedc}>\alpha/\beta$  (Fig. 6f,h). The basal fluorescence levels are lower with Voltron2 though (Fig. 6g,i), which contributes to the more moderate improvement of SNR as compared to  $\Delta F/F$ .

## **In vivo voltage imaging in mouse hippocampus and visual cortex**

We next tested Voltron2-ST *in vivo* in parvalbumin (PV) expressing interneurons in the CA1 region of the mouse hippocampus. Cells expressing soma-targeted Voltron<sub>2552</sub>-ST and labeled with JF<sub>552</sub> were individually illuminated using a DMD-based patterned illumination microscope, and the fluorescence responses of up to 34 neurons were imaged simultaneously at 2000 frames per second (Fig. 7a,b). Spontaneous APs in PV-positive interneurons induced nearly two-fold larger fluorescence changes in Voltron<sub>2552</sub> compared to Voltron<sub>552</sub> expressing neurons (Fig. 7c,d). The baseline fluorescence was dimmer for Voltron<sub>2552</sub> (Fig. 7e), leading to slightly larger recording noise (Fig. 7f). Yet the overall SNR was still significantly improved compared to Voltron<sub>552</sub> (Fig. 7g). The number of visually identifiable neurons was comparable despite the dimmer baseline fluorescence (Supplementary Fig. 11a). Furthermore, photobleaching was significantly slower in Voltron<sub>2552</sub> compared to Voltron<sub>552</sub>-expressing cells (Supplementary Fig. 11b;  $9.9\pm 5.8\%$  vs.  $15.6\pm 4.6\%$  in 3 minutes, respectively).

Voltron<sub>2525</sub>-ST was then evaluated and benchmarked against Voltron<sub>525</sub>-ST in the mouse primary visual cortex. We used one-photon epifluorescence microscopy with structured illumination and the same protocol as previously (Abdelfattah et al. 2019). The chronic cranial window and a mixture of Cre-dependent Voltron and dilute CaMKIIa-Cre viruses enabled sparse, but very bright, labeling of pyramidal neurons (Fig. 7h). APs and subthreshold fluctuations were clearly observable using both sensors (Fig. 7i,j). Voltron<sub>2552</sub>-ST produced larger  $\Delta F/F$  responses from spikes in cortical pyramidal neurons (Fig. 7k), and higher imaging rate led to larger responses from both indicators. Similar to other preparations, we observed that Voltron<sub>552</sub>-ST was significantly brighter than Voltron<sub>2552</sub>-ST (Fig. 7l). As shot noise is dominant in high-speed imaging, we observed smaller relative noise in the brighter Voltron<sub>552</sub>-ST-expressing neurons compared to Voltron<sub>2552</sub>-ST-expressing neurons (Fig. 7m). There was no significant difference in SNR between the two sensors in this preparation (Fig. 7n), likely because the improved  $\Delta F/F$  of Voltron<sub>2552</sub> was offset by its higher noise. We subsequently focused on the improved sensitivity of Voltron<sub>2552</sub> around resting membrane potential. Low-frequency membrane voltage oscillations in individual cortical neurons in awake mice have previously been observed in the barrel (Crochet and Petersen 2006), auditory (Zhou et al. 2014) and visual cortices (Bennett et al. 2013). We focused on brief (1–2 s long) periods of 3–5 Hz oscillations around a  $\sim 12$  mV hyperpolarized baseline, exhibiting a peak-to-peak amplitude of  $\sim 17$  mV (Einstein et al. 2017). Due to the enhanced sensitivity of Voltron<sub>2552</sub> in the subthreshold range, 3-5Hz oscillations were significantly more pronounced when imaging Voltron<sub>2552</sub>-ST, exhibiting  $\sim 50\%$  larger amplitude (Fig. 7j,o). Together, these data indicate that Voltron<sub>2552</sub> significantly improves the quality of *in vivo* voltage imaging in multiple regions of the mouse brain.

## **Discussion**

Here we present Voltron2 which contains a mutation to Voltron that increased the sensitivity of the GEVI by  $> 50\%$  to APs in culture and *in vivo*. Moreover, Voltron2 is approximately 3-fold more sensitive to subthreshold changes due to its steeper slope around the resting membrane potential. As with our efforts to engineer positive-going FRET sensors (Abdelfattah et al. 2020), the mutation we discovered generalized to other Ace-based GEVIs with fluorescent protein reporters. In both Ace2N-mNeon and VARNAM, the A122D substitution increased sensitivity, particularly in the sub-threshold voltage range. Perhaps the sensitivity-improving mutations identified in our screen will also be useful for optimization of rhodopsin-only GEVIs, such as those based on Arch, that rely on imaging the dim retinal fluorescence directly.



Engineering improved GEVIs has been more challenging than GECIs. In this study, we screened >2,700 variants to attain ~50% increase in  $\Delta F/F_0$  in the Voltron scaffold. Applying the same mutagenesis and screening strategy to GCaMP, RCaMP and R-GECO1 calcium indicators yielded >500% increases in  $\Delta F/F_0$  with <1,000 screened variants (Dana et al. 2016, 2019). Further, combining mutations in GCaMP scaffolds has often yielded additive benefits, while doing so in the current context of the Ace2N rhodopsin ultimately did not produce any variants with significant improvements over the best single A122D mutation. It is possible that there are biophysical phenomena that impose a ceiling on the sensitivity of this scaffold. For example, it is expected that the FRET efficiency between the HaloTag-dye or FP donor and the rhodopsin retinal acceptor will limit the maximum fluorescence change. Each of these chromophores resides on or in a bulky protein domain, limiting their closest approach distance. We were intrigued to observe that the A122D mutation improved the sensitivity of the negative-going Voltron, but also decreased its fluorescence at resting membrane potential. It seems possible that additional mutations could restore the original resting fluorescence of Voltron while maintaining the improved sensitivity of A122D, leading to improved SNR, but our screens failed to identify such a variant. Mutations at the equivalent position of Ace2 A122D in bacteriorhodopsin changed the thermal stability of that protein (Wagner et al. 2013).

Various high-throughput platforms have been developed that have been used to screen for improved GEVIs (Chien et al. 2015; Kannan et al. 2018; Park et al. 2013; Piatkevich et al. 2018). The majority of these platforms utilize bacteria or tissue culture cells for screening. We instead opted to perform our high-content primary screen in dissociated neurons, a costlier and more time-consuming strategy, but one that maximized the compatibility of the resulting sensor with *in vivo* neuronal imaging. Even still, our field stimulation screen was insufficiently sensitive to disambiguate the top-performing sensors. We therefore relied on the automated patch-clamp system that afforded us the ability to screen dozens of sensors faster than possible manually, without compromising data quality. The system had a lower throughput than the field stimulation screen but enabled us to characterize the sensitivity and kinetics of many variants with much higher fidelity. The combination of both field stimulation and patch-clamp screens provided a high-quality assessment of top-performing variants.

We show that like its predecessor, Voltron2 can be readily used for *in vivo* imaging in mice, flies, and fish, as well as acute brain slice imaging in mice. These experiments generally confirm the characteristics of Voltron2 that we discovered in our cell culture screen; namely increased  $\Delta F/F_0$  (particularly in the sub-threshold range), improved SNR, reduced baseline fluorescence, and reduced photobleaching in some preparations. These improvements were consistent among the dye ligands that were tested *in vivo* (JF<sub>525</sub>, JF<sub>552</sub>, and JF<sub>585</sub>). The increased sensitivity of Voltron2 in the subthreshold range was shown to significantly improve the detectability of 10-20 mV oscillations. Given the richness of information contained within subthreshold activity, including excitatory and inhibitory PSPs, oscillations of various frequencies, spikelets, and other features, Voltron2 can be a valuable tool for unveiling neuronal computations in intact preparations. In addition, in multiple preparations, Voltron2 extended the functional imaging time, which will push the limits of the biology that can be studied.

Increasing the sensitivity of GEVIs (the difference in photon flux per millivolt change in membrane potential) and reducing photobleaching still remain the main challenges to increase the adoption of GEVIs for *in vivo* experimentation. Protein engineering efforts devoted to creating two-photon-compatible GEVIs will also be required to address the emerging trend in the field to image deep in the brain while maintaining single-cell resolution. Chemigenetic indicators like Voltron2 continue to be promising scaffolds to address these goals.

## References

- Abdelfattah AS, Kawashima T, Singh A, Novak O, Liu H, Shuai Y, Huang Y-C, Campagnola L, Seeman SC, Yu J, Zheng J, Grimm JB, Patel R, Friedrich J, Mensh BD, Paninski L, Macklin JJ, Murphy GJ, Podgorski K, Lin B-J, Chen T-W, Turner GC, Liu Z, Koyama M, Svoboda K, Ahrens MB, Lavis LD, Schreiter ER. Bright and photostable chemogenetic indicators for extended in vivo voltage imaging. *Science* 365: 699–704, 2019.
- Abdelfattah AS, Valenti R, Zheng J, Wong A, Podgorski K, Koyama M, Kim DS, Schreiter ER. A general approach to engineer positive-going eFRET voltage indicators. *Nat Commun* 11: 3444, 2020.
- Aso Y, Hattori D, Yu Y, Johnston RM, Iyer NA, Ngo T-T, Dionne H, Abbott L, Axel R, Tanimoto H, Rubin GM. The neuronal architecture of the mushroom body provides a logic for associative learning. *eLife* 3: e04577, 2014.
- Badon A, Bensussen S, Gritton HJ, Awal MR, Gabel CV, Han X, Mertz J. Video-rate large-scale imaging with Multi-Z confocal microscopy. *Optica* 6: 389–395, 2019.
- Bennett C, Arroyo S, Hestrin S. Subthreshold mechanisms underlying state-dependent modulation of visual responses. *Neuron* 80: 350–357, 2013.
- Berg S, Kutra D, Kroeger T, Straehle CN, Kausler BX, Haubold C, Schiegg M, Ales J, Beier T, Rudy M, Eren K, Cervantes JI, Xu B, Beuttenmueller F, Wolny A, Zhang C, Koethe U, Hamprecht FA, Kreshuk A. ilastik: interactive machine learning for (bio)image analysis. *Nat Methods* 16: 1226–1232, 2019.
- Boyden ES, Zhang F, Bamberg E, Nagel G, Deisseroth K. Millisecond-timescale, genetically targeted optical control of neural activity. *Nat Neurosci* 8: 1263–1268, 2005.
- Cai C, Friedrich J, Pnevmatikakis EA, Podgorski K, Giovannucci A. VolPy: automated and scalable analysis pipelines for voltage imaging datasets. *bioRxiv* 2020.01.02.892323, 2020.
- Campagnola L, Kratz MB, Manis PB. ACQ4: an open-source software platform for data acquisition and analysis in neurophysiology research. *Front Neuroinformatics* 8: 3, 2014.
- Chien M-P, A. Werley C, L. Farhi S, E. Cohen A. Photostick: a method for selective isolation of target cells from culture. *Chem Sci* 6: 1701–1705, 2015.
- Chien M-P, Brinks D, Testa-Silva G, Tian H, Brooks FP, Adam Y, Bloxham W, Gmeiner B, Kheifets S, Cohen AE. Photoactivated voltage imaging in tissue with an archaerhodopsin-derived reporter. *Sci Adv* 7: eabe3216, 2021.
- Crochet S, Petersen CCH. Correlating whisker behavior with membrane potential in barrel cortex of awake mice. *Nat Neurosci* 9: 608–610, 2006.
- Curnow P, Di Bartolo ND, Moreton KM, Ajoje OO, Saggese NP, Booth PJ. Stable folding core in the folding transition state of an alpha-helical integral membrane protein. *Proc Natl Acad Sci U S A* 108: 14133–14138, 2011.
- Dana H, Mohar B, Sun Y, Narayan S, Gordus A, Hasseman JP, Tsegaye G, Holt GT, Hu A, Walpita D, Patel R, Macklin JJ, Bargmann CI, Ahrens MB, Schreiter ER, Jayaraman V, Looger LL, Svoboda K, Kim DS. Sensitive red protein calcium indicators for imaging neural activity. *eLife* 5: e12727, 2016.

Dana H, Sun Y, Mohar B, Hulse BK, Kerlin AM, Hasseman JP, Tsegaye G, Tsang A, Wong A, Patel R, Macklin JJ, Chen Y, Konnerth A, Jayaraman V, Looger LL, Schreiter ER, Svoboda K, Kim DS. High-performance calcium sensors for imaging activity in neuronal populations and microcompartments. *Nat Methods* 16: 649–657, 2019.

Dombeck DA, Harvey CD, Tian L, Looger LL, Tank DW. Functional imaging of hippocampal place cells at cellular resolution during virtual navigation. *Nat Neurosci* 13: 1433–1440, 2010.

Einstein MC, Polack P-O, Tran DT, Golshani P. Visually Evoked 3-5 Hz Membrane Potential Oscillations Reduce the Responsiveness of Visual Cortex Neurons in Awake Behaving Mice. *J Neurosci Off J Soc Neurosci* 37: 5084–5098, 2017.

Faham S, Yang D, Bare E, Yohannan S, Whitelegge JP, Bowie JU. Side-chain contributions to membrane protein structure and stability. *J Mol Biol* 335: 297–305, 2004.

Flytzanis NC, Bedbrook CN, Chiu H, Engqvist MKM, Xiao C, Chan KY, Sternberg PW, Arnold FH, Gradinaru V. Archaelhodopsin variants with enhanced voltage-sensitive fluorescence in mammalian and *Caenorhabditis elegans* neurons. *Nat Commun* 5: 4894, 2014.

Gibson DG, Young L, Chuang R-Y, Venter JC, Iii CAH, Smith HO. Enzymatic assembly of DNA molecules up to several hundred kilobases. *Nat Methods* 6: 343–345, 2009.

Gong Y, Huang C, Li JZ, Grewe BF, Zhang Y, Eismann S, Schnitzer MJ. High-speed recording of neural spikes in awake mice and flies with a fluorescent voltage sensor. *Science* aab0810, 2015.

Gong Y, Li JZ, Schnitzer MJ. Enhanced Archaelhodopsin Fluorescent Protein Voltage Indicators. *PLOS ONE* 8: e66959, 2013.

Grimm JB, English BP, Chen J, Slaughter JP, Zhang Z, Revyakin A, Patel R, Macklin JJ, Normanno D, Singer RH, Lionnet T, Lavis LD. A general method to improve fluorophores for live-cell and single-molecule microscopy. *Nat Methods* 12: 244–250, 2015.

Grimm JB, Muthusamy AK, Liang Y, Brown TA, Lemon WC, Patel R, Lu R, Macklin JJ, Keller PJ, Ji N, Lavis LD. A general method to fine-tune fluorophores for live-cell and *in vivo* imaging. *Nat Methods* 14: nmeth.4403, 2017.

Hochbaum DR, Zhao Y, Farhi SL, Klapoetke N, Werley CA, Kapoor V, Zou P, Kralj JM, Maclaurin D, Smedemark-Margulies N, Saulnier JL, Boulting GL, Straub C, Cho YK, Melkonian M, Wong GK-S, Harrison DJ, Murthy VN, Sabatini BL, Boyden ES, Campbell RE, Cohen AE. All-optical electrophysiology in mammalian neurons using engineered microbial rhodopsins. *Nat Methods* 11: 825–833, 2014.

Kannan M, Vasan G, Huang C, Haziza S, Li JZ, Inan H, Schnitzer MJ, Pieribone VA. Fast, *in vivo* voltage imaging using a red fluorescent indicator. *Nat Methods* 1, 2018.

Kim J-Y, Grunke SD, Levites Y, Golde TE, Jankowsky JL. Intracerebroventricular viral injection of the neonatal mouse brain for persistent and widespread neuronal transduction. *J Vis Exp JoVE* 51863, 2014.

Klapoetke NC, Murata Y, Kim SS, Pulver SR, Birdsey-Benson A, Cho YK, Morimoto TK, Chuong AS, Carpenter EJ, Tian Z, Wang J, Xie Y, Yan Z, Zhang Y, Chow BY, Surek B, Melkonian M, Jayaraman V, Constantine-Paton M, Wong GK-S, Boyden ES. Independent optical excitation of distinct neural populations. *Nat Methods* 11: 338–346, 2014.

Kolb I, Landry CR, Yip MC, Lewallen CF, Stoy WA, Lee J, Felouzis A, Yang B, Boyden ES, Rozell CJ, Forest CR. PatcherBot: a single-cell electrophysiology robot for adherent cells and brain slices. *J Neural Eng* 16: 046003, 2019.

Kolb I, Stoy WA, Rousseau EB, Moody OA, Jenkins A, Forest CR. Cleaning patch-clamp pipettes for immediate reuse. *Sci Rep* 6: 35001, 2016.

Kralj JM, Douglass AD, Hochbaum DR, Maclaurin D, Cohen AE. Optical recording of action potentials in mammalian neurons using a microbial rhodopsin. *Nat Methods* 9: 90–95, 2012.

Lin MZ, Schnitzer MJ. Genetically encoded indicators of neuronal activity. *Nat Neurosci* 19: 1142–1153, 2016.

Liu T-L, Upadhyayula S, Milkie DE, Singh V, Wang K, Swinburne IA, Mosaliganti KR, Collins ZM, Hiscock TW, Shea J, Kohrman AQ, Medwig TN, Dambournet D, Forster R, Cunniff B, Ruan Y, Yashiro H, Scholpp S, Meyerowitz EM, Hockemeyer D, Drubin DG, Martin BL, Matus DQ, Koyama M, Megason SG, Kirchhausen T, Betzig E. Observing the cell in its native state: Imaging subcellular dynamics in multicellular organisms. *Science* 360, 2018.

Los GV, Encell LP, McDougall MG, Hartzell DD, Karassina N, Zimprich C, Wood MG, Learish R, Ohana RF, Urh M, Simpson D, Mendez J, Zimmerman K, Otto P, Vidugiris G, Zhu J, Darzins A, Klaubert DH, Bulleit RF, Wood KV. HaloTag: A Novel Protein Labeling Technology for Cell Imaging and Protein Analysis. *ACS Chem Biol* 3: 373–382, 2008.

Mclsaac RS, Engqvist MKM, Wannier T, Rosenthal AZ, Herwig L, Flytzanis NC, Imasheva ES, Lanyi JK, Balashov SP, Gradinaru V, Arnold FH. Directed evolution of a far-red fluorescent rhodopsin. *Proc Natl Acad Sci* 111: 13034–13039, 2014.

Packer AM, Russell LE, Dagleish HWP, Häusser M. Simultaneous all-optical manipulation and recording of neural circuit activity with cellular resolution in vivo. *Nat Methods* 12: 140–146, 2015.

Park J, Werley CA, Venkatachalam V, Kralj JM, Dib-Hajj SD, Waxman SG, Cohen AE. Screening Fluorescent Voltage Indicators with Spontaneously Spiking HEK Cells. *PLOS ONE* 8: e85221, 2013.

Perálvarez-Marín A, Lórenz-Fonfría VA, Simón-Vázquez R, Gomariz M, Meseguer I, Querol E, Padrós E. Influence of proline on the thermostability of the active site and membrane arrangement of transmembrane proteins. *Biophys J* 95: 4384–4395, 2008.

Piatkevich KD, Jung EE, Straub C, Linghu C, Park D, Suk H-J, Hochbaum DR, Goodwin D, Pnevmatikakis E, Pak N, Kawashima T, Yang C-T, Rhoades JL, Shemesh O, Asano S, Yoon Y-G, Freifeld L, Saulnier JL, Riegler C, Engert F, Hughes T, Drobizhev M, Szabo B, Ahrens MB, Flavell SW, Sabatini BL, Boyden ES. A robotic multidimensional directed evolution approach applied to fluorescent voltage reporters. *Nat Chem Biol* 14: 352, 2018.

Pnevmatikakis EA, Giovannucci A. NoRMCorre: An online algorithm for piecewise rigid motion correction of calcium imaging data. *J Neurosci Methods* 291: 83–94, 2017.

Pologruto TA, Sabatini BL, Svoboda K. ScanImage: Flexible software for operating laser scanning microscopes. *Biomed Eng OnLine* 2: 13, 2003.

St-Pierre F, Marshall JD, Yang Y, Gong Y, Schnitzer MJ, Lin MZ. High-fidelity optical reporting of neuronal electrical activity with an ultrafast fluorescent voltage sensor. *Nat Neurosci* 17: 884–889, 2014.

Ting Jonathan T, Daigle Tanya L, Chen Q, Feng G. Acute Brain Slice Methods for Adult and Aging Animals: Application of Targeted Patch Clamp Analysis and Optogenetics. In: *Patch-Clamp Methods and Protocols*, edited by Martina M, Taverna S. Springer New York, p. 221–242.

Wagner NL, Greco JA, Ranaghan MJ, Birge RR. Directed evolution of bacteriorhodopsin for applications in bioelectronics. *J R Soc Interface* 10: 20130197, 2013.

Wardill TJ, Chen T-W, Schreier ER, Hasseman JP, Tsegaye G, Fosque BF, Behnam R, Shields BC, Ramirez M, Kimmel BE, Kerr RA, Jayaraman V, Looger LL, Svoboda K, Kim DS. A Neuron-Based Screening Platform for Optimizing Genetically-Encoded Calcium Indicators. *PLOS ONE* 8: e77728, 2013.

Xu Y, Zou P, Cohen AE. Voltage imaging with genetically encoded indicators. *Curr Opin Chem Biol* 39: 1–10, 2017.

Yardeni T, Eckhaus M, Morris HD, Huizing M, Hoogstraten-Miller S. Retro-orbital injections in mice. *Lab Anim* 40: 155–160, 2011.

Zheng Q, Ayala AX, Chung I, Weigel AV, Ranjan A, Falco N, Grimm JB, Tkachuk AN, Wu C, Lippincott-Schwartz J, Singer RH, Lavis LD. Rational Design of Fluorogenic and Spontaneously Blinking Labels for Super-Resolution Imaging. *ACS Cent Sci* 5: 1602–1613, 2019.

Zhou M, Liang F, Xiong XR, Li L, Li H, Xiao Z, Tao HW, Zhang LI. Scaling down of balanced excitation and inhibition by active behavioral states in auditory cortex. *Nat Neurosci* 17: 841–850, 2014.

Zou P, Zhao Y, Douglass AD, Hochbaum DR, Brinks D, Werley CA, Harrison DJ, Campbell RE, Cohen AE. Bright and fast multicoloured voltage reporters via electrochromic FRET. *Nat Commun* 5: 4625, 2014.



## Author contributions

We use the CRediT taxonomy to clarify author contributions.

|      | Conceptualization | Methodology | Software | Formal Analysis | Investigation | Resources | Data curation | Writing/visualization | Supervision | Project administration |
|------|-------------------|-------------|----------|-----------------|---------------|-----------|---------------|-----------------------|-------------|------------------------|
| ASA  |                   |             |          |                 |               |           |               |                       |             |                        |
| JZ   |                   |             |          |                 |               |           |               |                       |             |                        |
| DR   |                   |             |          |                 |               |           |               |                       |             |                        |
| GT   |                   |             |          |                 |               |           |               |                       |             |                        |
| AT   |                   |             |          |                 |               |           |               |                       |             |                        |
| BJA  |                   |             |          |                 |               |           |               |                       |             |                        |
| MR   |                   |             |          |                 |               |           |               |                       |             |                        |
| CVLO |                   |             |          |                 |               |           |               |                       |             |                        |
| YCH  |                   |             |          |                 |               |           |               |                       |             |                        |
| YS   |                   |             |          |                 |               |           |               |                       |             |                        |
| MK   |                   |             |          |                 |               |           |               |                       |             |                        |
| MVM  |                   |             |          |                 |               |           |               |                       |             |                        |
| TDW  |                   |             |          |                 |               |           |               |                       |             |                        |
| ALL  |                   |             |          |                 |               |           |               |                       |             |                        |
| CAB  |                   |             |          |                 |               |           |               |                       |             |                        |
| NF   |                   |             |          |                 |               |           |               |                       |             |                        |
| QZ   |                   |             |          |                 |               |           |               |                       |             |                        |
| JBG  |                   |             |          |                 |               |           |               |                       |             |                        |
| MCY  |                   |             |          |                 |               |           |               |                       |             |                        |
| DW   |                   |             |          |                 |               |           |               |                       |             |                        |
| CRF  |                   |             |          |                 |               |           |               |                       |             |                        |
| MC   |                   |             |          |                 |               |           |               |                       |             |                        |
| LC   |                   |             |          |                 |               |           |               |                       |             |                        |
| GM   |                   |             |          |                 |               |           |               |                       |             |                        |
| AMW  |                   |             |          |                 |               |           |               |                       |             |                        |
| JM   |                   |             |          |                 |               |           |               |                       |             |                        |
| MNE  |                   |             |          |                 |               |           |               |                       |             |                        |
| GTu  |                   |             |          |                 |               |           |               |                       |             |                        |
| BJL  |                   |             |          |                 |               |           |               |                       |             |                        |
| TWC  |                   |             |          |                 |               |           |               |                       |             |                        |
| ON   |                   |             |          |                 |               |           |               |                       |             |                        |
| LDL  |                   |             |          |                 |               |           |               |                       |             |                        |
| KS   |                   |             |          |                 |               |           |               |                       |             |                        |
| WK   |                   |             |          |                 |               |           |               |                       |             |                        |
| ERS  |                   |             |          |                 |               |           |               |                       |             |                        |
| JPH  |                   |             |          |                 |               |           |               |                       |             |                        |
| IK   |                   |             |          |                 |               |           |               |                       |             |                        |

## Acknowledgements

We thank the Janelia cell culture, vivarium, jET, Molecular biology, and Virus Production teams for their assistance. We thank S. Picard, K. Aswath, S. Shrestha for help with DeepSeq. ON, MR, CVLO acknowledge funding from Charles University Grant - PRIMUS/19/MED/003.

## Competing interests

A.S.A., L.D.L., and E.R.S. have filed for a patent on chemigenetic voltage indicators. IK and CRF are co-inventors on a patent describing pipette cleaning that is licensed by Sensapex. MC and LC have performed consulting services for Sensapex.

## Figures

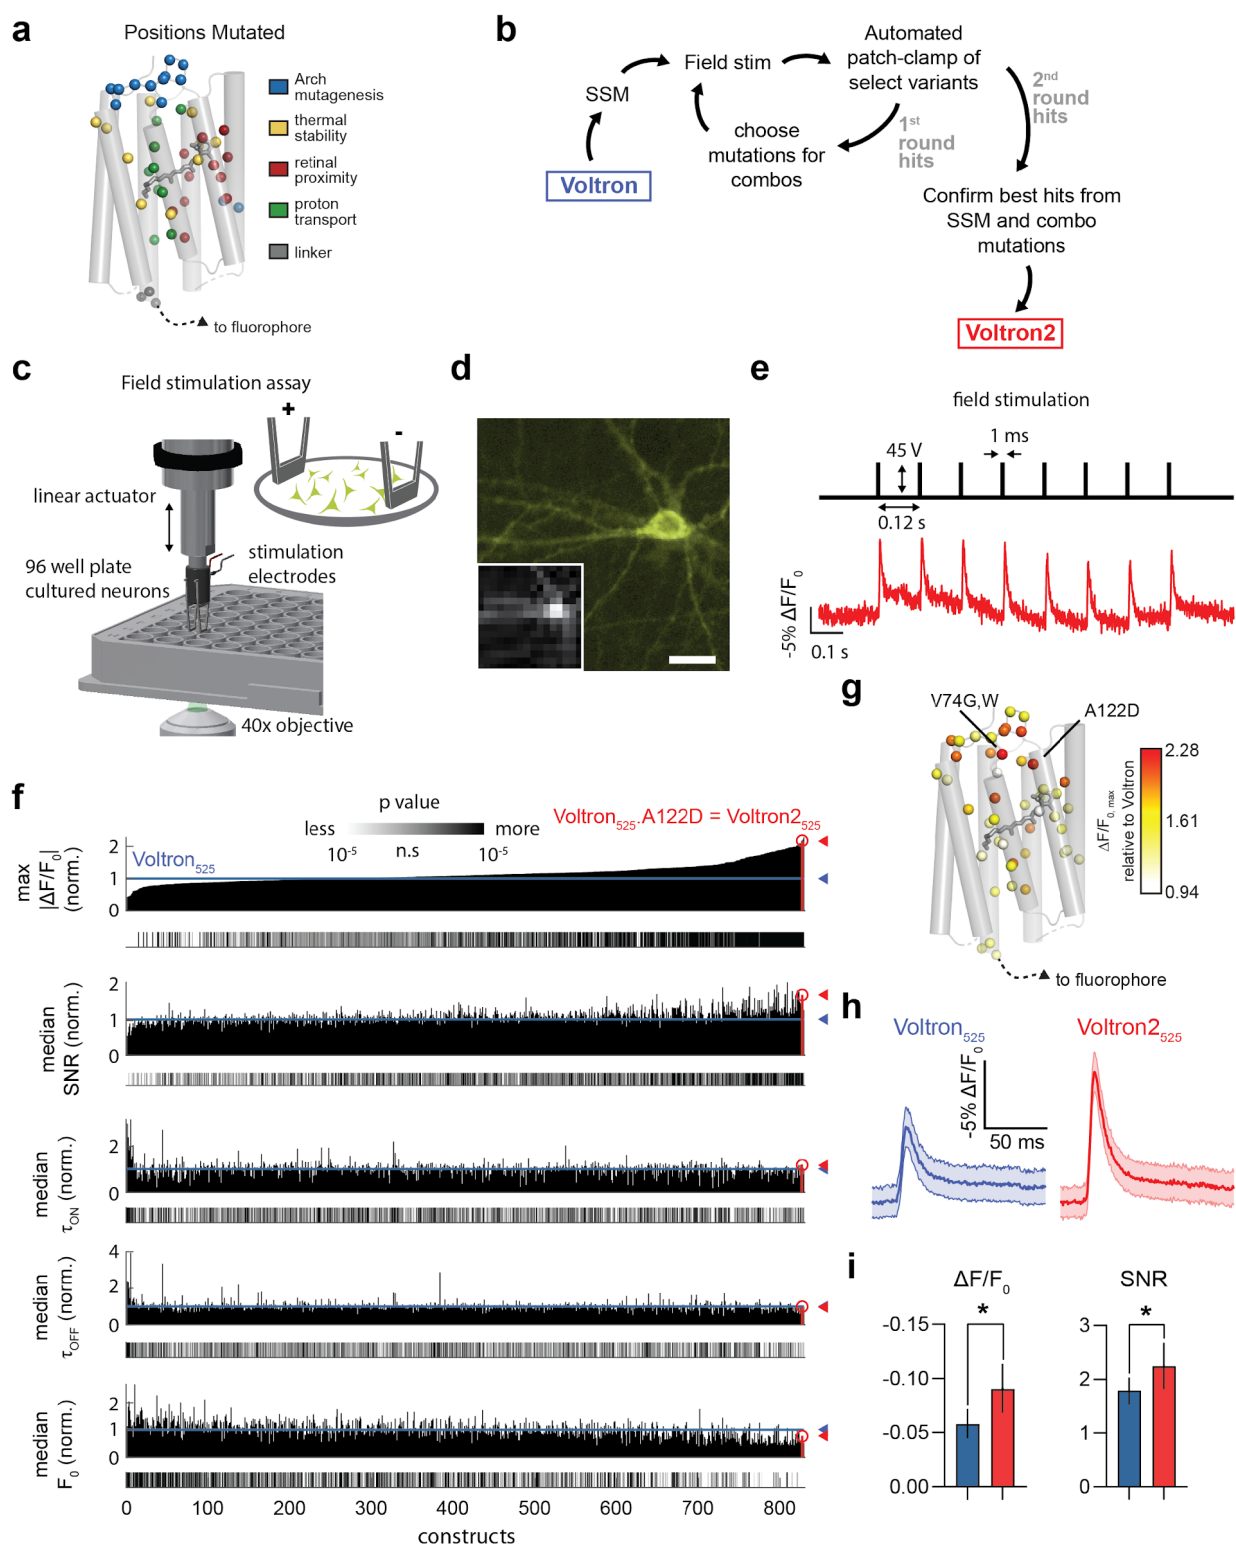

Figure 1: Mutagenesis and screening of Voltron in cultured neurons. a. Residues targeted for SSM in the Ace2N rhodopsin domain of Voltron, colored by the rationale for targeting them. b. Mutagenesis and screening workflow. c. Diagram of field stimulation assay performed in 96-well plates. d. Representative image of neuron from the screen expressing Voltron2 labeled with JF<sub>525</sub>, Voltron2<sub>525</sub>. Inset shows representative frame during

fast (1,497 Hz) stream acquisition. Scale bar: 10  $\mu\text{m}$ . e. Field stimulation parameters (top, black) and acquired fluorescence response of the neuron shown in d (bottom, red). All imaging in the screen was performed at a light density of 1.14 mW/mm<sup>2</sup> measured in the image plane. f. Results of single-mutation Voltron<sub>525</sub> screen, ranked by maximum  $|\Delta F/F_0|$  for each variant, normalized to in-plate Voltron<sub>525</sub> controls (top). Color-coded p values are shown below each plot, indicating significant difference compared to in-plate controls. g. Mutated residues colored by the maximum increase in  $|\Delta F/F_0|$  achieved in that position. Top three mutations are labeled. h. Representative traces (mean  $\pm$  s.e.m.) from a single plate containing Voltron<sub>525</sub> (8 wells) and Voltron<sub>2525</sub> (8 wells). i. Single AP  $\Delta F/F_0$  (Voltron<sub>525</sub>:  $-0.059 \pm 0.001$ , n=338 wells; Voltron<sub>2525</sub>:  $-0.090 \pm 0.002$ , n=130 wells; P<0.0001, Mann-Whitney U test) and SNR of Voltron<sub>2525</sub> and SNR (Voltron<sub>525</sub>:  $1.80 \pm 0.013$ ; Voltron<sub>2525</sub>:  $2.24 \pm 0.040$ ; P<0.0001, Mann-Whitney U test).

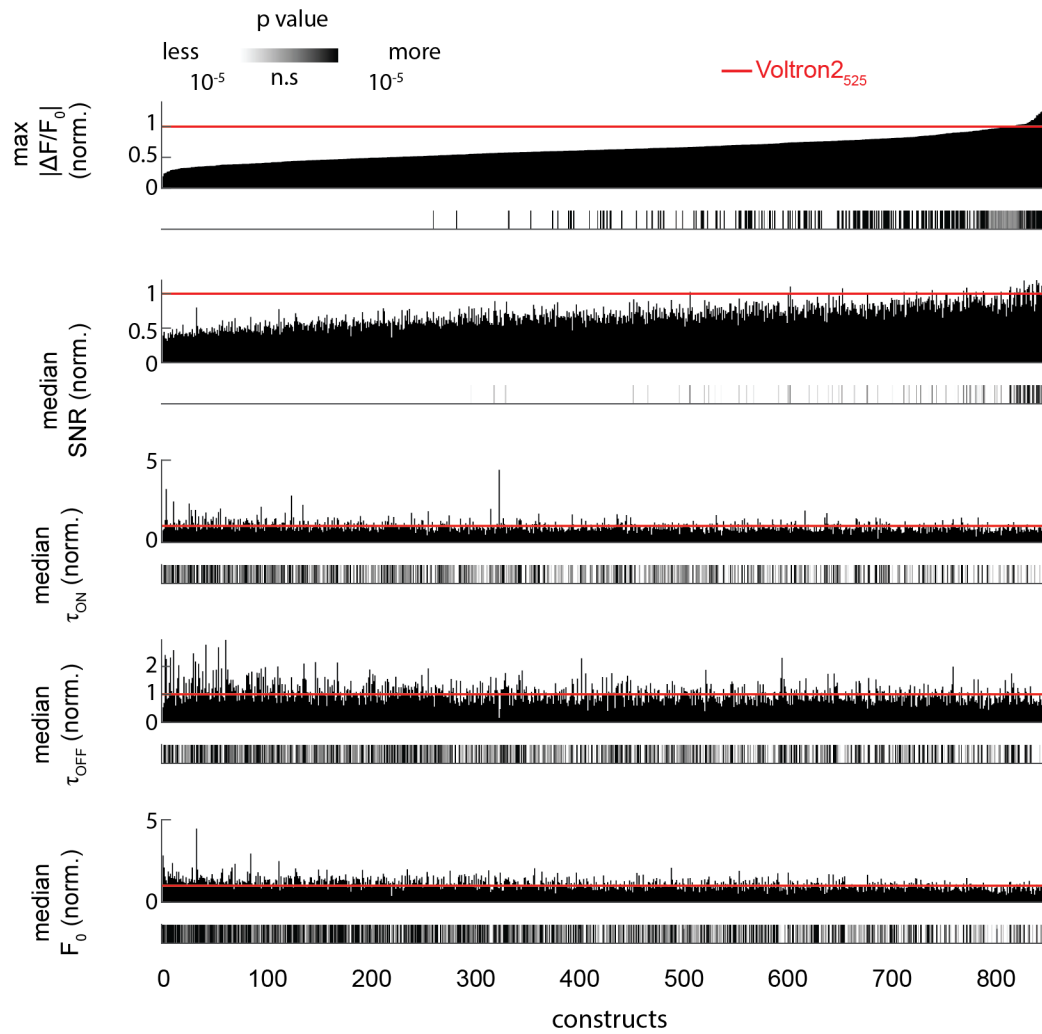

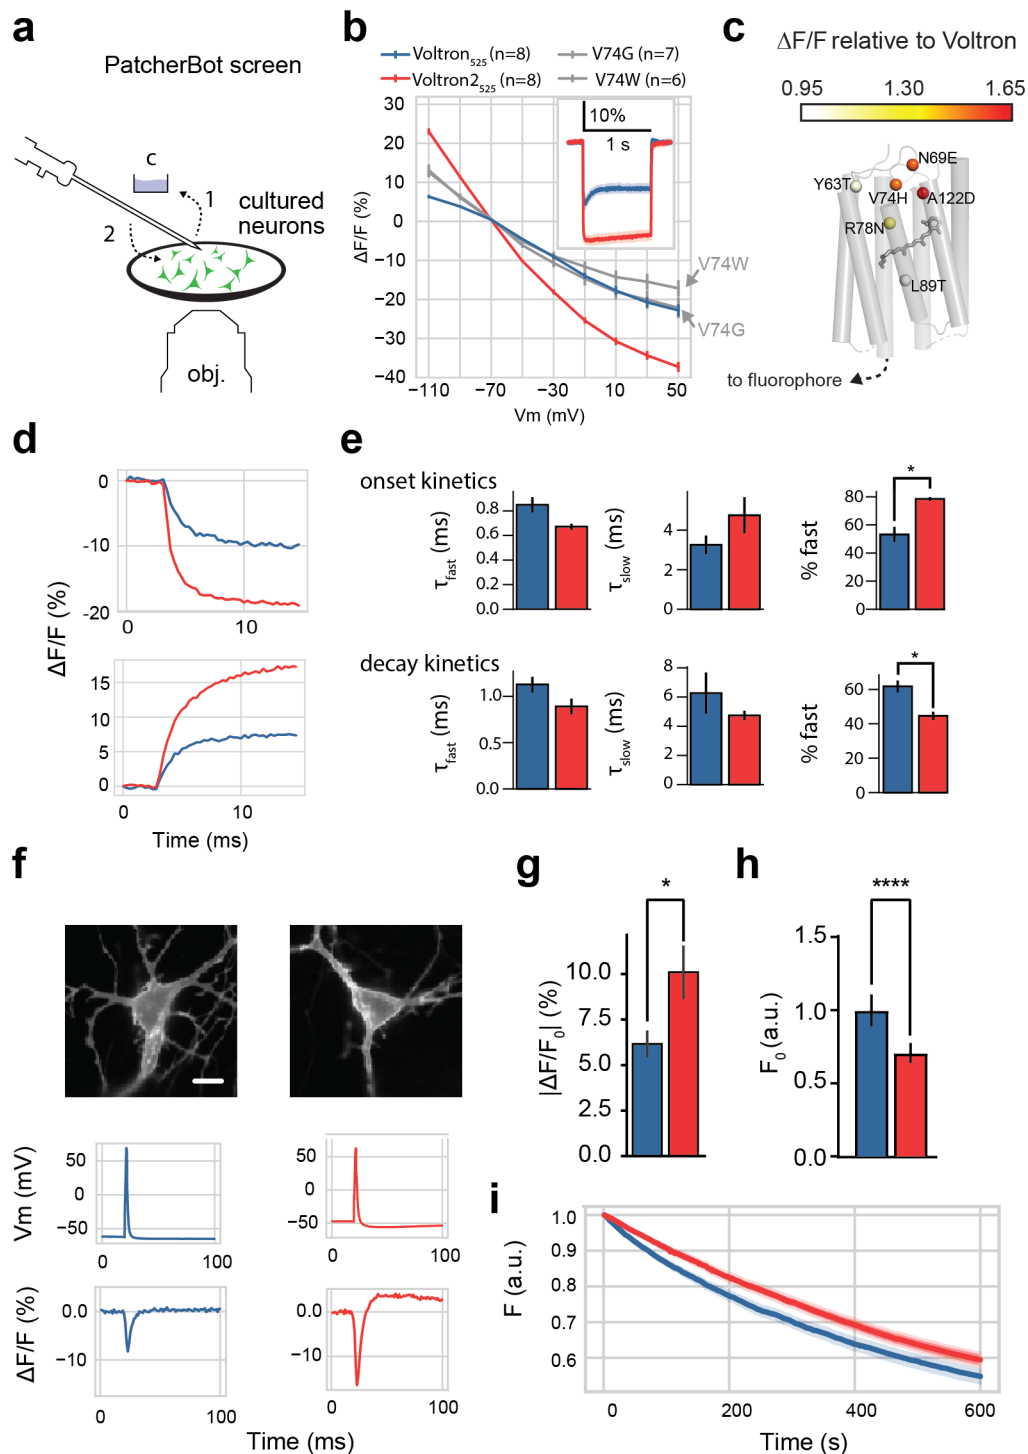

Figure 2: Automated patch-clamp screening and Voltron2 characterization in cultured neurons. a. Fully automated uM workstation screening platform, based on PatcherBot. The pipette cleaning procedure is shown where a used pipette is dipped into a reservoir of cleaning solution (step 1, “c”) and back to the neuronal culture for a subsequent patch-clamp attempt without the need for replacing the pipette (step 2). b. Peak fluorescence response to voltage steps from -70 mV of Voltron<sub>525</sub>, Voltron<sub>2525</sub> and the top two variants from the field stimulation assay (Voltron<sub>2525</sub> vs. Voltron<sub>525</sub>: P=0.012; Voltron<sub>2525</sub> vs. Voltron<sub>525</sub>.V74G: P=0.015; Voltron<sub>2525</sub> vs. Voltron<sub>525</sub>.V74W: P=0.0003, one-way ANOVA followed by Dunnett’s post-hoc test). Inset: Voltron<sub>525</sub> and Voltron<sub>2525</sub> fluorescence traces (mean  $\pm$  s.e.m.) in response to -70 to +30 mV voltage steps. c. Mutated residues from 1<sup>st</sup> screening round (single sites) colored by the maximum  $\Delta F/F_0$  response to 100 mV (-



70 to +30 mV) voltage steps, measured with the uM workstation. Top mutations at each position are labeled. d. Representative onset (top) and decay (bottom) fluorescence kinetics of Voltron<sub>525</sub> and Voltron2<sub>525</sub> in response to a +100 mV voltage step from -70 mV. e. Onset and decay kinetics. Onset kinetics: \*P=0.03, Mann-Whitney U test. Decay kinetics: \*P=0.03, Mann-Whitney U test. f. Representative fluorescence responses to single evoked APs in current clamp. Scale bar: 10  $\mu$ m. g.  $\Delta F/F_0$  in response to single AP stimulation in current clamp mode (\*P = 0.03, Student's unpaired t test). h. Normalized resting fluorescence relative to mTagBFP2 fused to the C terminus (\*\*\*\*P<0.0001; Voltron<sub>525</sub>: n=105 cells, Voltron2<sub>525</sub>: n=115 cells). i. Photobleaching comparison of Voltron<sub>525</sub> and Voltron2<sub>525</sub> over 10 mins.

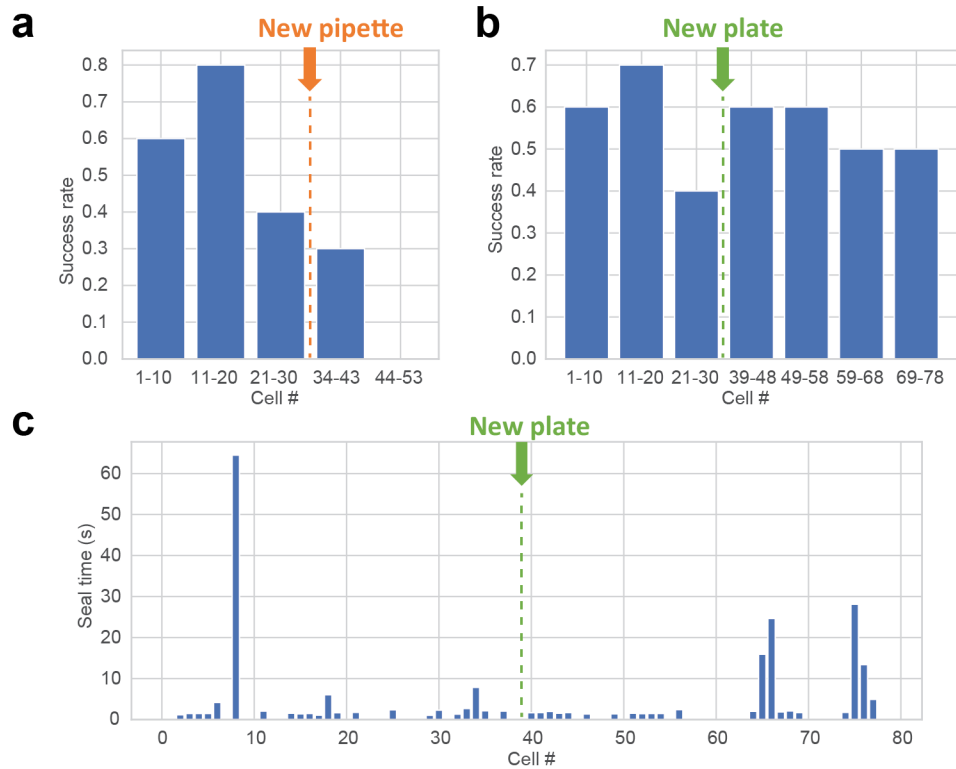

Supplementary Figure 2: Pipette cleaning with the uM Workstation. a. Whole-cell recording success rate with pipette cleaning after every recording. The pipette was replaced after 30 recordings, but the success rate did not improve. b. Whole-cell recording success rate with a single reused pipette. A new plate of neurons was used after the 30<sup>th</sup> cell, causing the success rate to improve. c. Time to form a gigaseal over multiple cells using a single pipette. A blank entry indicates that the gigaseal was unsuccessful. A new plate of neurons was used after the 38<sup>th</sup> cell.

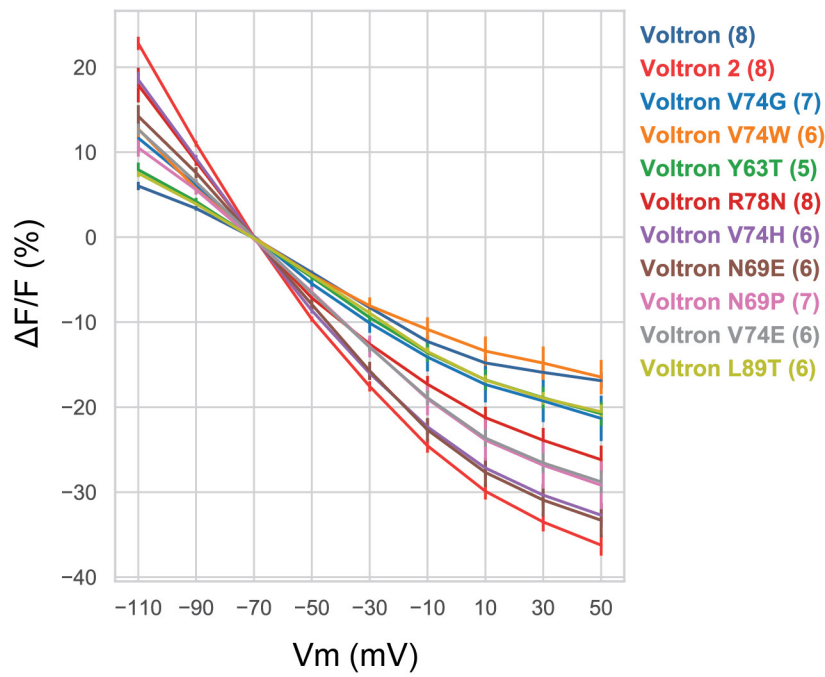

Supplementary Figure 3: Peak fluorescence response to voltage steps from -70 mV of the top variants from the field stimulation assay, with Voltron and Voltron2 traces (reproduced from Fig. 2) superimposed for reference. Number in parentheses indicates the number of neurons assayed. All sensor mutants were conjugated to JF<sub>525</sub> dyes for these experiments (Voltron<sub>525</sub>).

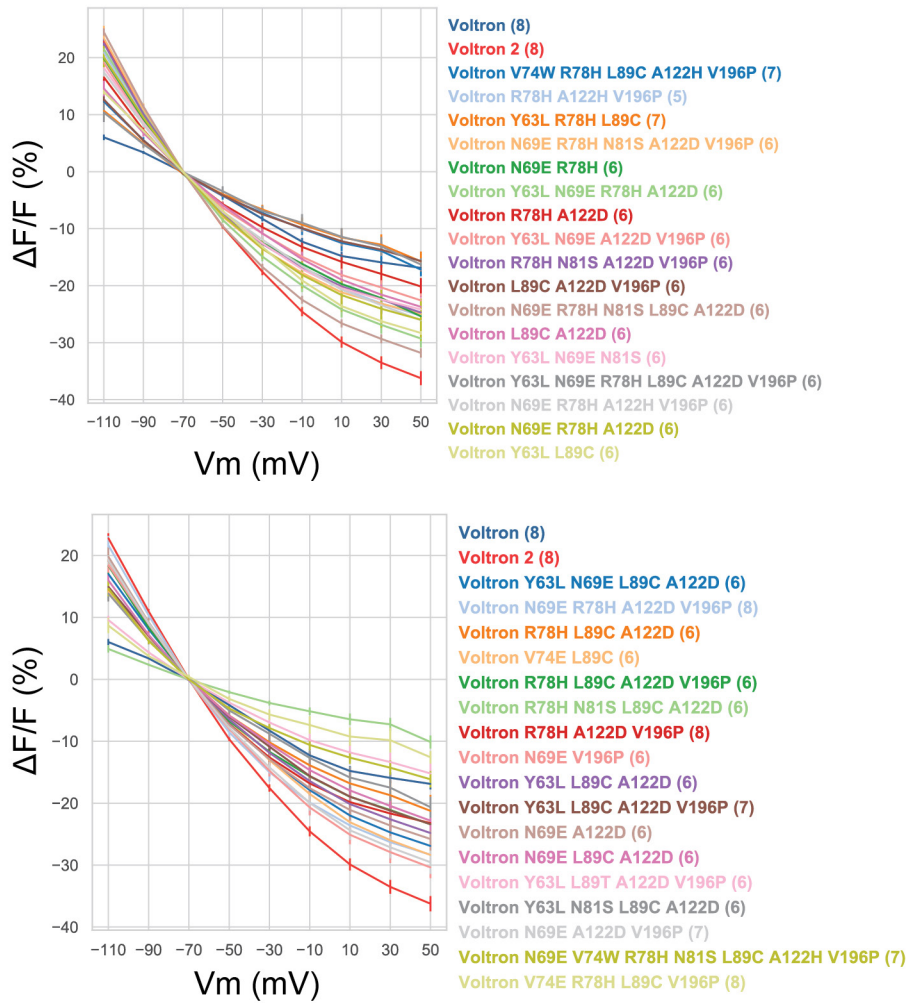

Supplementary Figure 4: Peak fluorescence response to voltage steps of Voltron, Voltron2 (reproduced from Fig. 2) and the top-performing combo variants from the field stimulation assay. For clarity, variants are divided into two panels. Number in parentheses indicates the number of neurons assayed. All sensor mutants were conjugated to JF<sub>525</sub> dyes for these experiments (Voltron<sub>525</sub>).

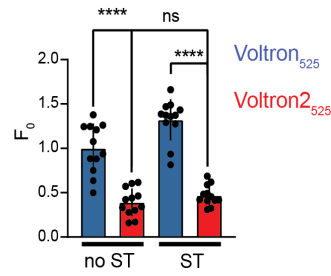

Supplementary Figure 5: Baseline fluorescence of non soma-tagged (no ST) and soma-tagged (ST) Voltron<sub>525</sub> and Voltron<sub>2525</sub> (n=12 neurons for each, from single transfection; error bars: s.d.; \*\*\*\*: P<0.0001; n.s.: P=0.80; one-way ANOVA followed by Tukey's multiple comparison test). See Supplementary Figs. 6, 7 for cell images.



**a.**

Voltron<sub>525</sub>

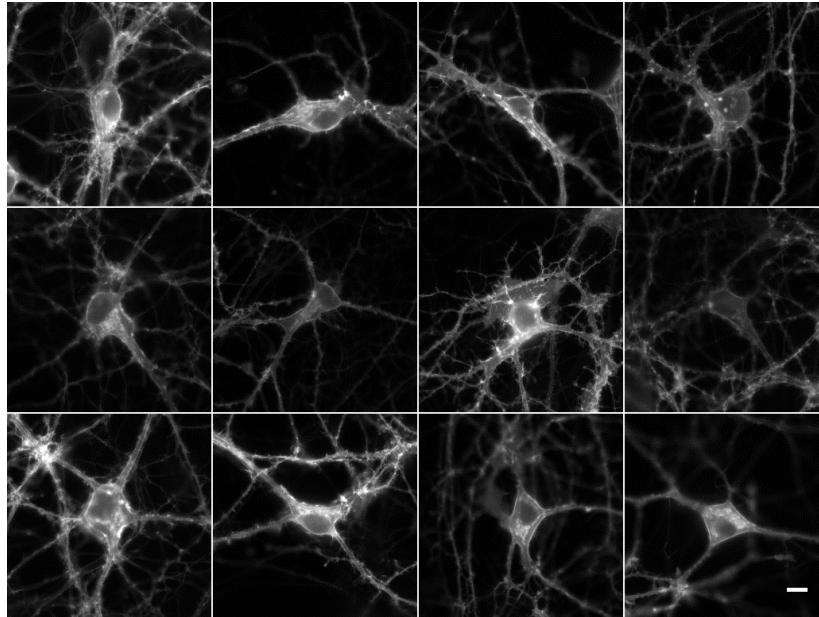

**b.**

Voltron<sub>2525</sub>

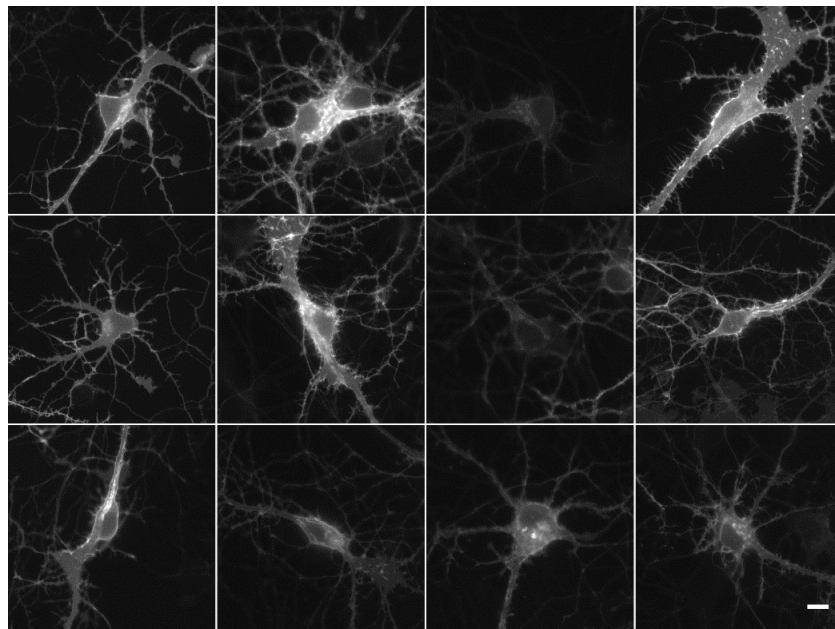

Supplementary Figure 6. Representative fluorescent images of cultured hippocampal neurons expressing (non-soma tagged) Voltron<sub>525</sub> and Voltron<sub>2525</sub>. Images were taken with 15 mW/mm<sup>2</sup> light power and 30 ms exposure time. Dynamic ranges of images were rescaled for clarity. For quantitative comparison of fluorescence intensities, see Fig. 2h. Scale bar: 10  $\mu$ m

**a.**

Voltron<sub>525</sub>-ST

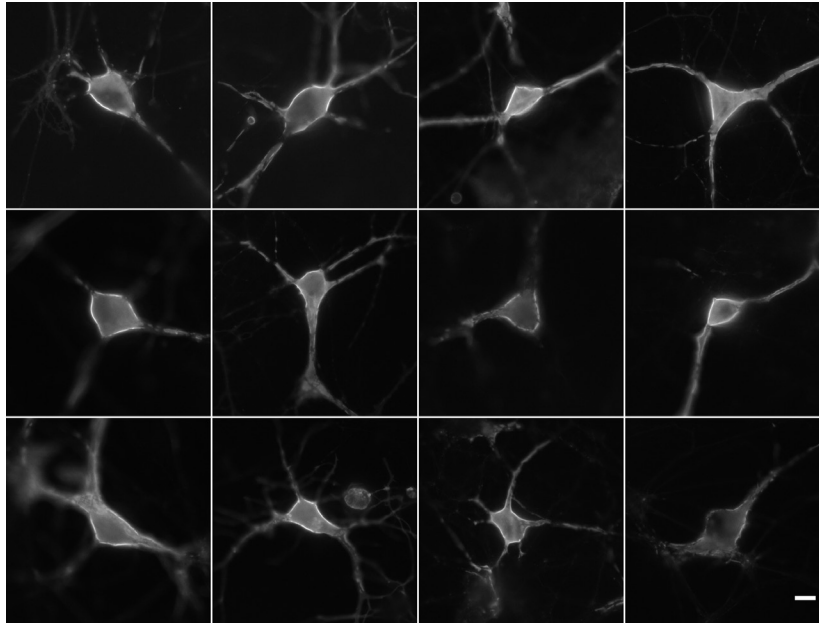

**b.**

Voltron<sub>2525</sub>-ST

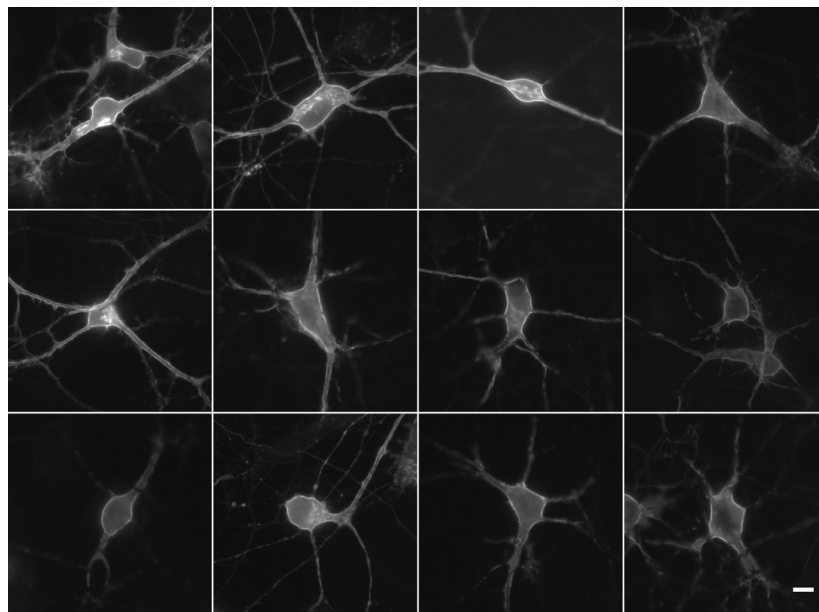

Supplementary Figure 7. Representative fluorescent images of cultured hippocampal neurons expressing soma-tagged Voltron<sub>525</sub> and Voltron<sub>2525</sub>. Images were taken with 15 mW/mm<sup>2</sup> light power and 30 ms exposure time. Dynamic ranges of images were rescaled for clarity. For quantitative comparison of fluorescence intensities, see Fig. 2h. Scale bar: 10  $\mu$ m

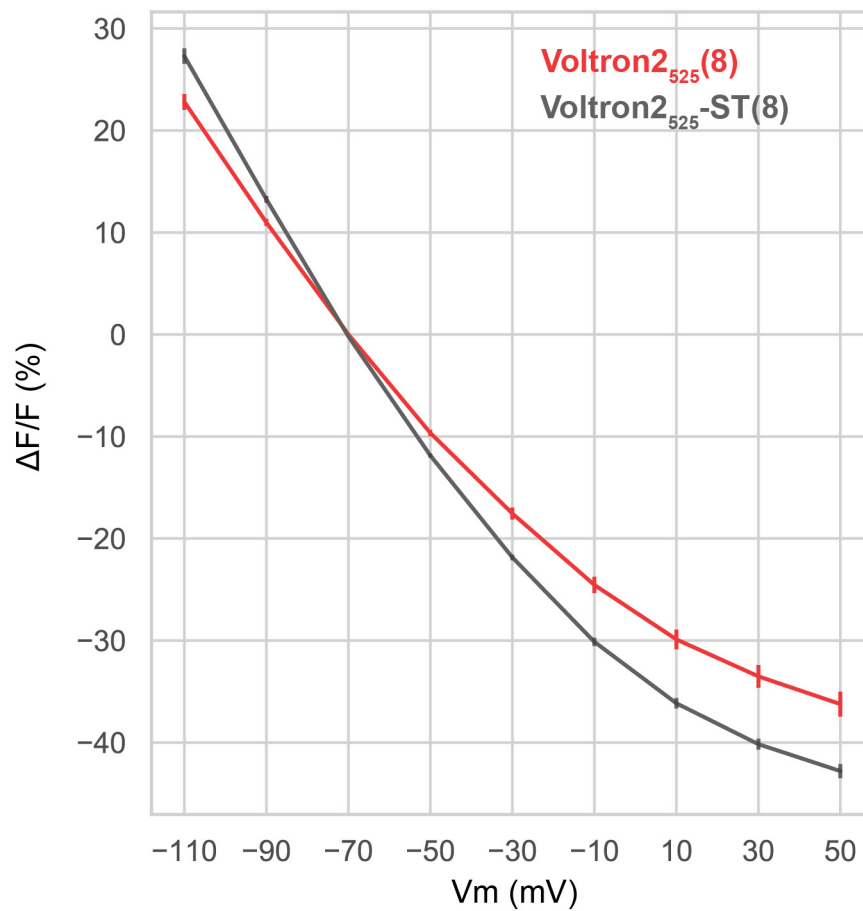

Supplementary Figure 8: Fluorescence response to voltage steps of Voltron2<sub>525</sub>-ST, compared to Voltron2<sub>525</sub> (reproduced from Fig. 2). Number in parentheses indicates the number of neurons assayed.

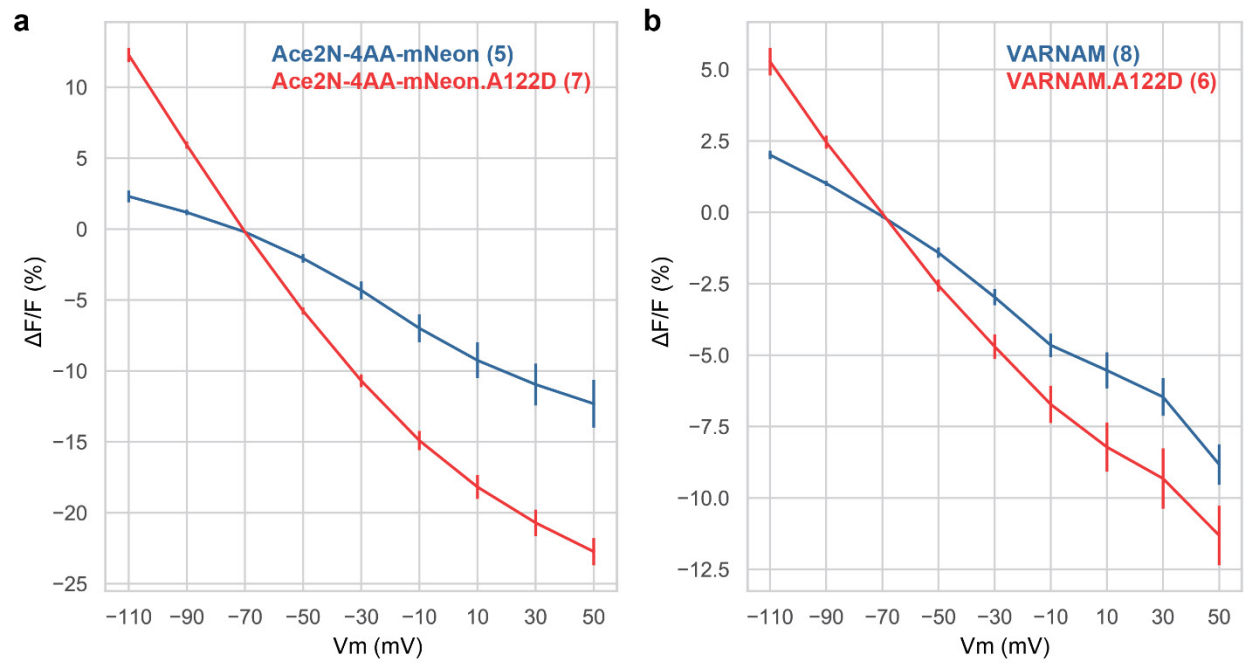

Supplementary Figure 9: Increased voltage sensitivities of Ace-based FRET opsin indicators. a. Peak fluorescence response to voltage steps from -70 mV of Ace-4AA-mNeon.A122D, with Ace-4AA-mNeon as control. b. Peak fluorescence response to voltage steps from -70 mV of VARNAM.A122D, with VARNAM as control. Number in parentheses indicates the number of neurons assayed.

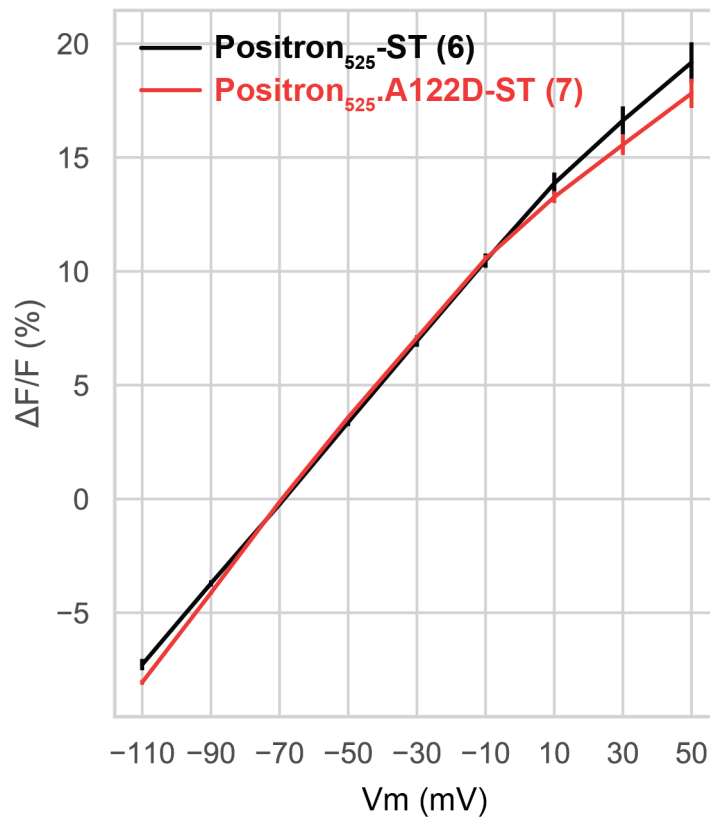

Supplementary Figure 10: Fluorescence response to voltage steps of Positron<sub>525</sub>-ST, compared to Positron<sub>525</sub>.A122D-ST. Number in parentheses indicates the number of neurons assayed.



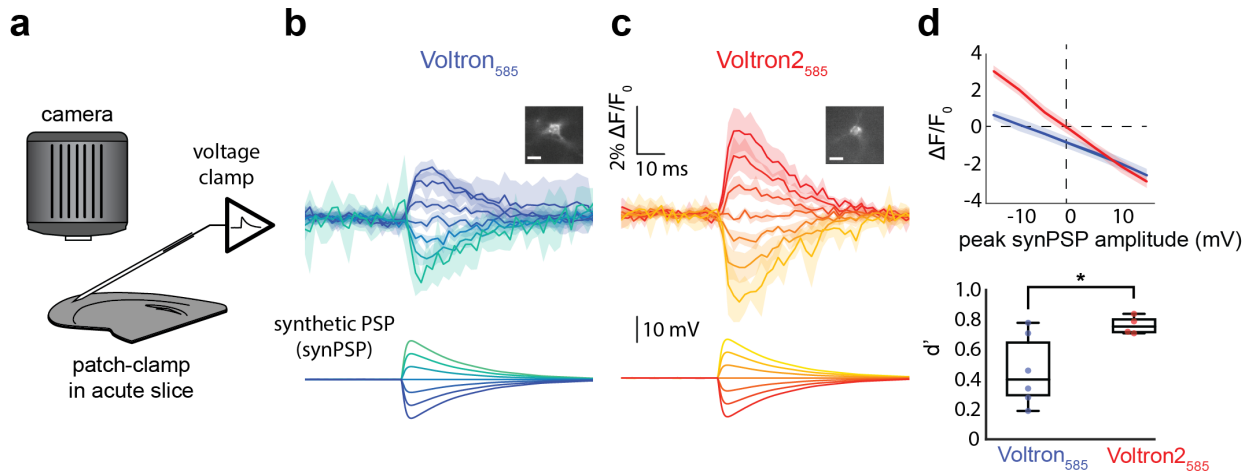

Figure 3: PSP detection using Voltron2 in mouse brain slices. a. Synthetic PSP (synPSP) experimental setup in acute mouse brain slice. b,c. Average  $\pm$  SD of percent change in fluorescence over time for Voltron<sub>585</sub> (b; n=6 cells) or Voltron2<sub>585</sub> (c, n=4 cells) in response to changes from resting membrane potential of -15mV to +15mV in 5mV increments (lower panels), intended to mimic typical inhibitory or excitatory synaptic transmission. A representative cell for each construct is shown in the inset (scale bar = 10 $\mu$ m). d. Top: average  $\pm$  SD of percent change in fluorescence as a function of the peak amplitude of the synthetic postsynaptic potential (synPSP) applied to the cell. Voltron does not cross the 0,0 point due to photobleaching in the course of the experiment. Bottom: sensitivity index ( $d'$ ) of Voltron2<sub>585</sub> is significantly higher than that of Voltron<sub>585</sub> ( $P=0.025$ , Welch's t-test).

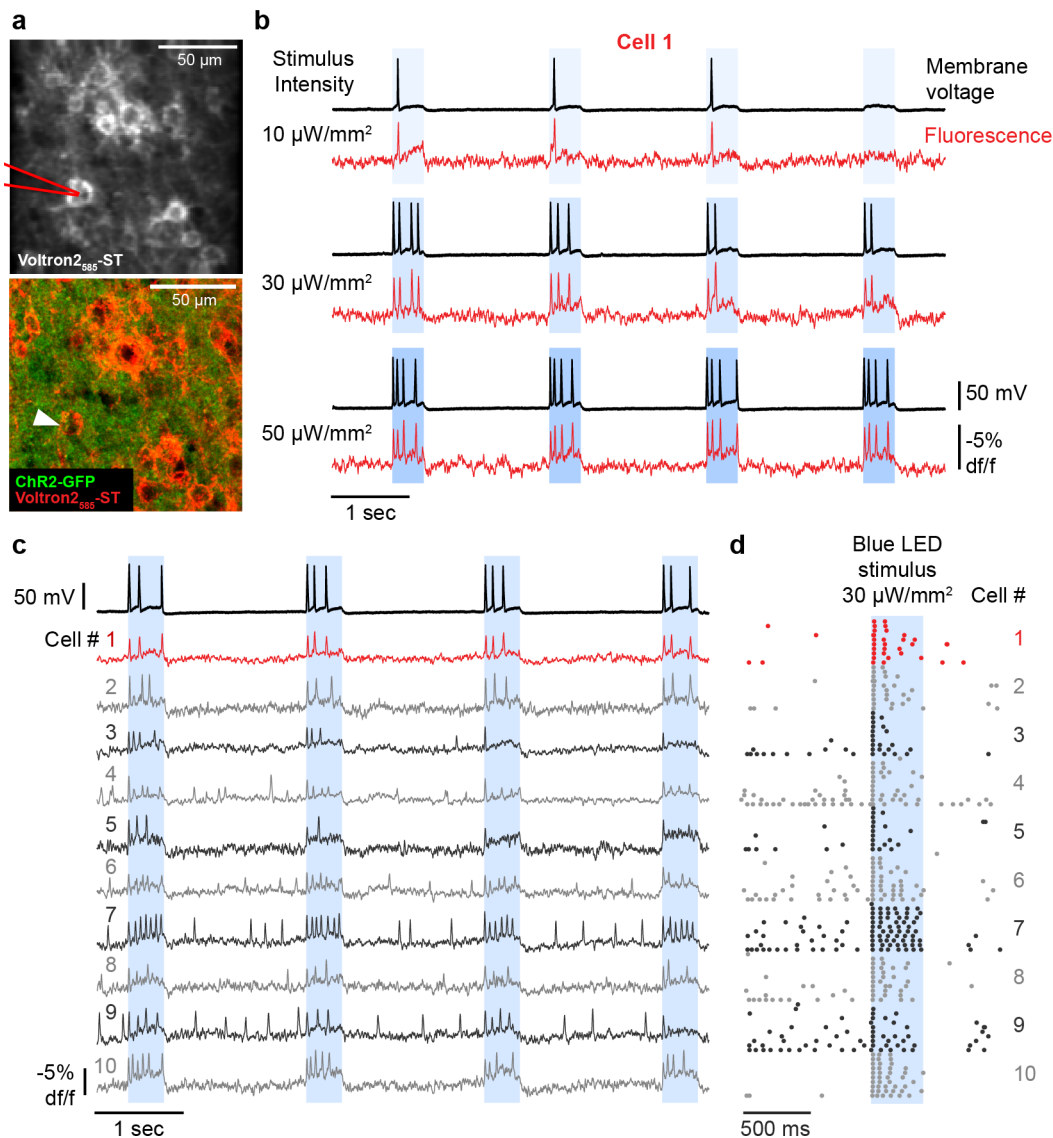

Figure 4: Simultaneous voltage imaging and optogenetic stimulation. **a.** (Top) Average intensity projection of 457 Hz confocal images showing Voltron2<sub>585</sub>-expressing cells labeled with JF<sub>585</sub> in an acute slice of motor cortex. Pipette used for whole-cell recordings illustrated in red. (Bottom) Post-hoc confocal image showing pan-neuronal expression of ChR2-GFP in the same field of view (FOV) shown in top panel, with patched cell #1 indicated by white arrow. **b.** Whole-cell membrane voltage (black traces) and corresponding Voltron2 fluorescent signal (red traces) from patched cell #1 shown in **a**, showing responses to 400 ms stimulation with 10 (top), 30 (middle), and 50  $\mu\text{W}/\text{mm}^2$  (bottom) blue light. **c.** Voltron2<sub>585</sub> signals (red and gray traces) recorded across 10 distinct cells in the FOV shown in **a** in response to 400 ms stimulation with 30  $\mu\text{W}/\text{mm}^2$  blue light. Corresponding membrane voltage is shown for patched cell # 1 (upper black trace). **d.** Raster plots show trial-aligned APs detected in fluorescent signals from cells #1-10 shown in **a** and **c**, across 10 repeated 400 ms blue stimulus trials.

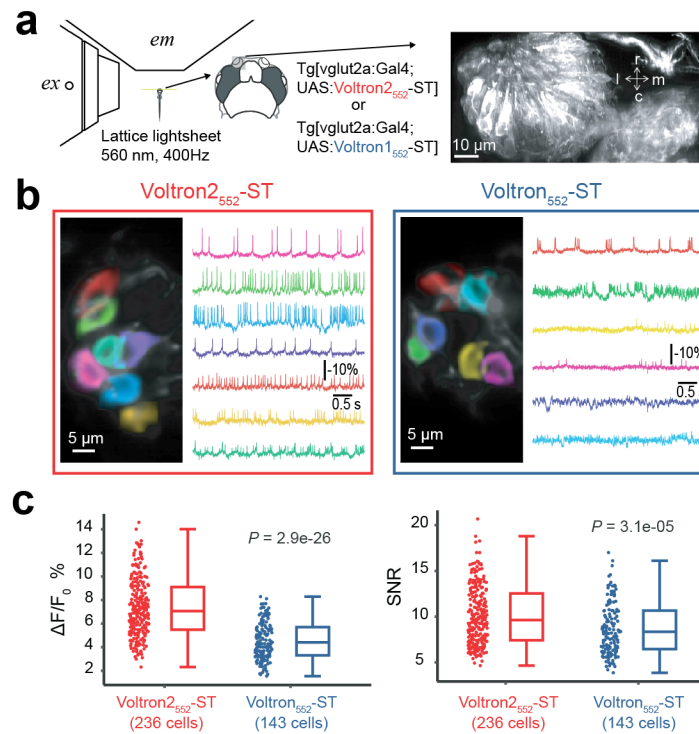

Figure 5: *In vivo* comparison of Voltron2-ST and Voltron-ST in zebrafish olfactory sensory neurons. a. Experimental setup. Left: Olfactory sensory neurons expressing Voltron2-ST or Voltron-ST, labeled with JF<sub>552</sub> and imaged at 400 Hz using a lattice-lightsheet microscope. ex: excitation objective lens, em: imaging objective lens. Right: Volumetric rendering of olfactory sensory neurons in the nasal cavity. r, rostral; c, caudal; m, medial; l, lateral. b. Representative FOVs and recordings. Spatial weights optimized for individual spiking neurons are shown in distinct colors over the structural image (left). The activity trace of corresponding neurons is shown in the same color (right). c. Performance comparisons of Voltron2<sub>552</sub>-ST and Voltron<sub>552</sub>-ST. Left: Distribution of spike-related fluorescence change of Voltron2<sub>552</sub>-ST and Voltron<sub>552</sub>-ST. Right: Distribution of SNR of Voltron2<sub>552</sub>-ST and Voltron<sub>552</sub>-ST. Statistical differences were assessed with the Wilcoxon rank-sum test.

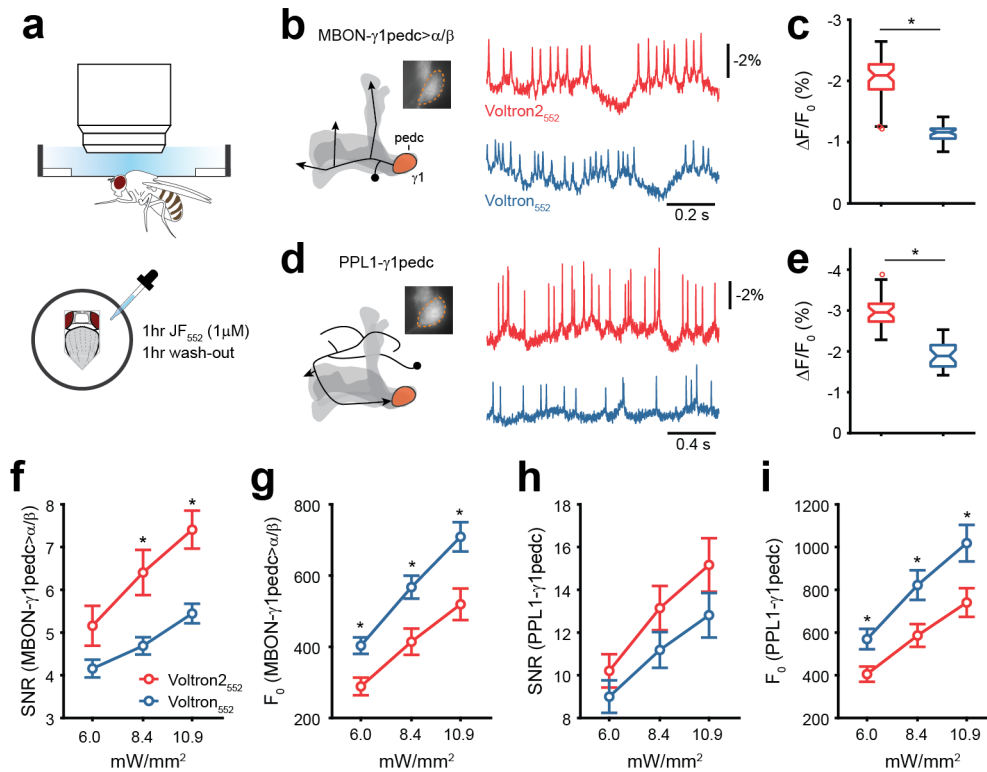

Figure 6: a. Experimental setup. A head-fixed fly is imaged using an sCMOS camera at 800 frames per second. Voltron is loaded with JF<sub>552</sub>-Halotag ligand via a 1hr incubation/1hr wash-out protocol. b,d. Voltage recordings in MBON- $\gamma$ 1pedc $>\alpha/\beta$  (*MB112C-Gal4*) and PPL1- $\gamma$ 1pedc (*MB320C-Gal4*). Neuron schematics are shown for the left hemisphere with the MB in shaded gray (arrowheads indicate axonal outputs). Fluorescence images were acquired from the  $\gamma$ 1 compartment (inset, 50  $\mu$ m x 50  $\mu$ m), which contains dendrites of MBON- $\gamma$ 1pedc $>\alpha/\beta$  and axon terminals of PPL1- $\gamma$ 1pedc. Single-trial recordings of  $\Delta F/F_0$  traces are shown (8.4 and 6.0 mW/mm<sup>2</sup> for b and d respectively). c. Spike amplitude with Voltron<sub>2552</sub> and Voltron<sub>552</sub> in MBON- $\gamma$ 1pedc $>\alpha/\beta$ .  $P < 0.001$ , Wilcoxon rank sum test. For Voltron<sub>2552</sub>, the data set was from 15 hemispheres (8 flies) at three levels of illumination for a total of 45 experiments, for Voltron<sub>552</sub>, 13 hemispheres (7 flies) with 39 experiments. e. Spike amplitude in PPL1- $\gamma$ 1pedc.  $P < 0.001$ , Wilcoxon rank sum test. For both Voltron<sub>2552</sub> and Voltron<sub>552</sub>, the dataset was from 10 flies at three levels of illumination for 30 total experiments. f,h. SNR calculated as spike amplitude over standard deviation of the spike-free zones of the trace.  $P = 0.07, 0.006, 0.003$  between Voltron<sub>2552</sub> and Voltron<sub>552</sub> in MBON- $\gamma$ 1pedc $>\alpha/\beta$ ,  $P = 0.28, 0.16, 0.17$  in PPL1- $\gamma$ 1pedc, two-sample t-test. g,i. Lower basal fluorescence levels with Voltron<sub>2552</sub>.  $P < 0.01$  in MBON- $\gamma$ 1pedc $>\alpha/\beta$ ,  $P < 0.05$  in PPL1- $\gamma$ 1pedc, two-sample t-test. \* indicates  $P < 0.05$ .

### *in vivo* mouse hippocampus (PV neurons)

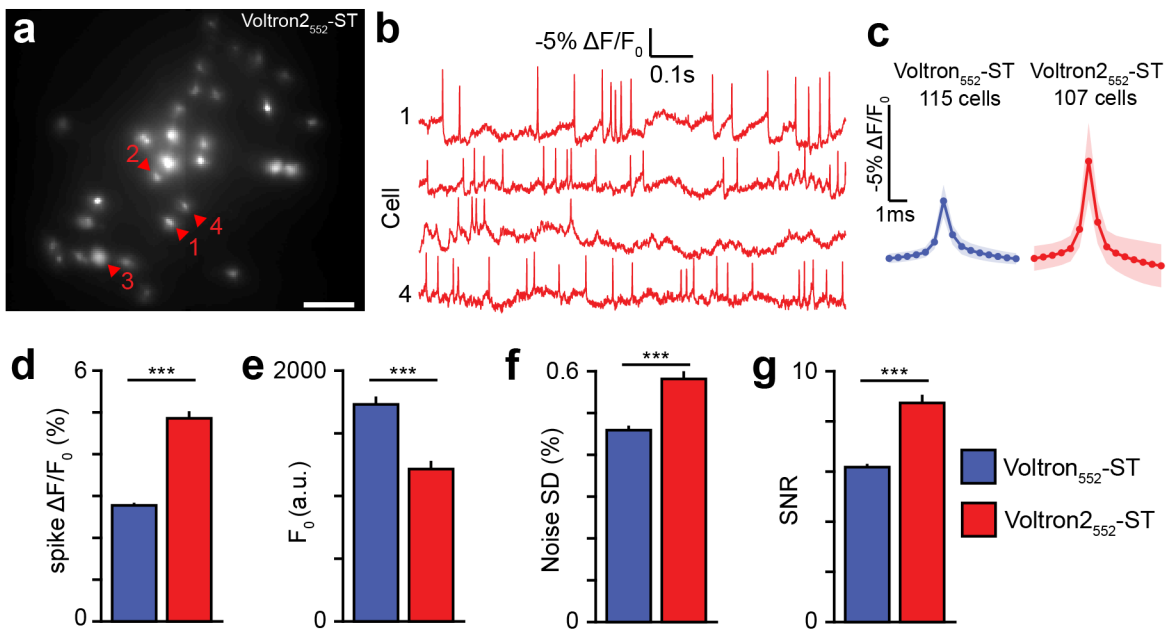

### *in vivo* mouse cortex

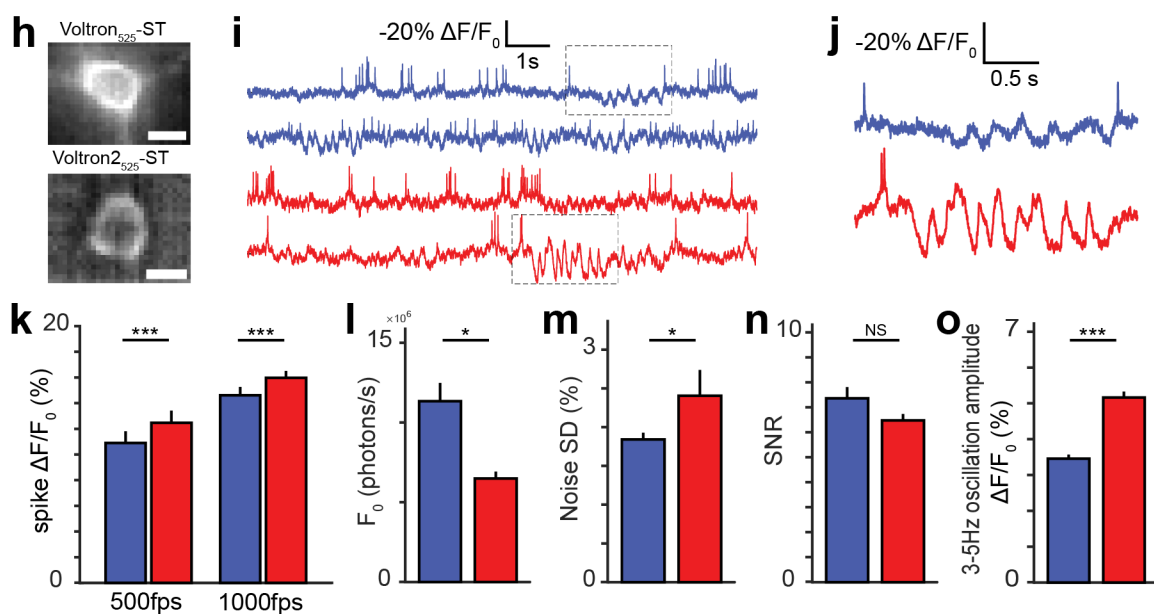

Figure 7: Imaging of voltage activity *in vivo* in mouse hippocampus and cortex with Voltron and Voltron2. a. Example image of hippocampal PV neurons expressing Voltron2-ST labeled with JF<sub>552</sub>. b. Sample fluorescence traces of cell 1 to 4 in (a). c. Average spike waveforms of cells expressing Voltron<sub>552</sub>-ST or Voltron<sub>2552</sub>-ST. d-g. Comparison of Voltron<sub>552</sub>-ST and Voltron<sub>2552</sub>-ST spike amplitude (d), baseline fluorescence (e), noise standard deviation (f), and SNR (g) in hippocampal PV neurons. h. Example images of cortical pyramidal neurons expressing Voltron-ST (top) or Voltron2-ST (bottom) labeled with JF<sub>525</sub>. Scale bar: 10  $\mu$ m. i. Example fluorescence traces from individual neurons recorded using Voltron<sub>525</sub>-ST (blue) and Voltron<sub>2525</sub>-ST (red) detrended using a 5s median filter. Grey dashed boxes indicate detection of 3-5Hz oscillations shown in (j) and quantified in (o). j. Zoomed portions of the fluorescence traces in (i) showing spikes and 3-5Hz oscillations. k-o. Comparison of Voltron<sub>525</sub>-ST and Voltron<sub>2525</sub>-ST spike amplitude at both 500 and 1000 frames per second imaging rates (k), baseline fluorescence (l), noise standard deviation (m), SNR (n), and 3-5Hz oscillation amplitude (o) in cortical pyramidal neurons. For all plots: Statistically significant



differences between groups were determined by Wilcoxon rank-sum test. \*  $p < 0.05$ , \*\*  $p < 0.01$ , \*\*\*  $p < 0.001$ . Error bars indicate SEM.

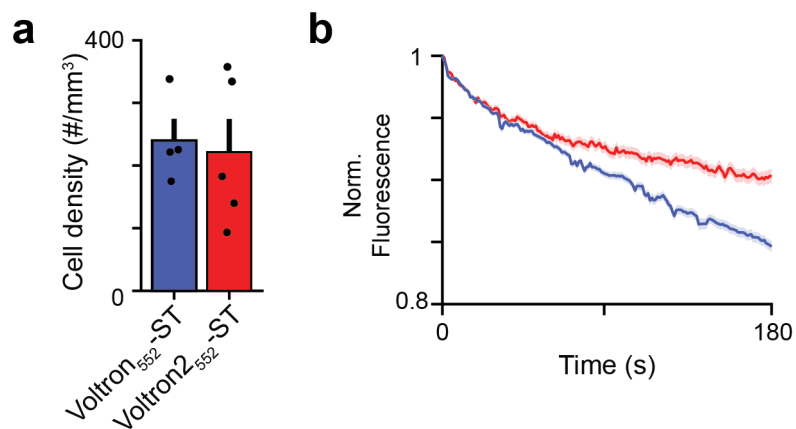

Supplementary Figure 11: a. Density of visually identifiable neurons in mouse CA1. b. Photobleaching comparison of Voltron<sub>552</sub> and Voltron<sub>2552</sub> in mouse CA1 (solid color: mean, shading: SEM).

## Tables

**Supplementary Table 1:** Screening results of field stimulation assay on Voltron point mutants. Normalization performed to in-plate Voltron controls.

**Supplementary Table 2:** Screening results of field stimulation assay on Voltron combo mutants. Normalization performed to in-plate Voltron controls.

**Supplementary Table 3:** Combo variants containing the A122D mutation, arranged by the number of mutations. Data aggregated from Supplementary Table 2.

**Supplementary Table 4:** Custom primers used for library tagmentation and NextSeq sequencing
